# Supplementary material for: A systematic review and meta-analysis of inflammatory biomarkers in Parkinson’s disease
Source: PubMed Central journal article supplement (PMC9899271; doi:10.1038/s41531-023-00449-5), 2023-02-04
Supplement: 41531_2023_449_MOESM2_ESM.pdf [file 41531_2023_449_MOESM2_ESM.pdf]

**Title: Fluid Biomarkers of Inflammation in Parkinson's Disease: A Systematic  
Review and Meta-Analysis**

**CONTENT**

| <b>TITLE</b>                                                                                                                                                     | <b>PAGE</b> |
|------------------------------------------------------------------------------------------------------------------------------------------------------------------|-------------|
| Supplementary Table 1. Characteristics of included studies.                                                                                                      | 2 to 23     |
| Supplementary Table 2. Quality assessment.                                                                                                                       | 24 to 27    |
| Supplementary Table 3. Official cytokine names.                                                                                                                  | 28 to 30    |
| Supplementary Table 4. Summary of comparative outcomes of peripheral blood cytokines levels in individuals with PD versus controls.                              | 31 to 33    |
| Supplementary Table 5. Summary of comparative outcomes of cerebrospinal fluid cytokines levels in individuals with PD versus controls.                           | 34 to 35    |
| Supplementary Table 6. PRISMA 2009 Checklist.                                                                                                                    | 36 to 38    |
| Supplementary Table 7. Search strategy.                                                                                                                          | 39          |
| Supplementary Figure 1. Comparative outcomes of peripheral blood cytokines levels for PD patients versus controls (not significant).                             | 40          |
| Supplementary Figure 2. Comparative outcomes of peripheral blood cytokines levels for PD patients versus controls in the systematic review (not significant).    | 41          |
| Supplementary Figure 3. Comparative outcomes of cerebrospinal fluid cytokines levels for PD patients versus controls (not significant).                          | 43          |
| Supplementary Figure 4. Comparative outcomes of cerebrospinal fluid cytokines levels for PD patients versus controls in the systematic review (not significant). | 43          |
| Supplementary Figure 5. KEGG pathway enrichment analysis and PPI network construction analysis.                                                                  | 44          |

**Supplementary Table 1. Characteristics of included studies.**

| No. | Author           | Year | Region  | Sample source | Assay Type | Samples, n |     | Age, y      |            | Gender     |            | PD evaluations      |             |             | Ref. |           |
|-----|------------------|------|---------|---------------|------------|------------|-----|-------------|------------|------------|------------|---------------------|-------------|-------------|------|-----------|
|     |                  |      |         |               |            | PD         | HC  | PD          | HC         | PD         | HC         | Criteria            | Duration, y | H-Y         |      | UPDRS-III |
| 1   | Mogi, M.         | 1994 | Japan   | CSF           | ELISA      | 15         | 16  | 58 (40-70)  | 46 (25-75) | M6<br>F9   | M6<br>F10  | NA                  | 1-30        | NA          | NA   | [1]       |
| 2   | BlumDegen, D.    | 1995 | Germany | CSF           | ELISA      | 22         | 12  | 61 (1.5)    | 61 (4.2)   | M12<br>F10 | M6<br>F6   | NA                  | 0.5-3       | NA          | NA   | [2]       |
| 3   | Klueter, H.      | 1995 | Germany | Blood         | ELISA      | 20         | 19  | 63.3 (5.0)  | 61.1 (3.2) | M11<br>F9  | M12<br>F8  | UKPDSBBC            | 6.7 (1-17)  | 1-4         | NA   | [3]       |
| 4   | Mogi, M.         | 1996 | Japan   | VCSF          | ELISA      | 14         | 13  | 68 (54-75)  | 46 (14-65) | M7<br>F7   | M10<br>F3  | NA                  | NA          | NA          | NA   | [4]       |
| 5   | Stypula, G.      | 1996 | Poland  | Plasma        | RIA        | 21         | 13  | 64.6 (2.0)  | 46 (14-65) | M14<br>F7  | M10<br>F3  | NA                  | NA          | 1-3         | NA   | [5]       |
| 6   | Vawter, M. P.    | 1996 | USA     | CSF           | ELISA      | 30         | 16  | 73.8 (1.4)  | 72.7 (3.1) | M22<br>F8  | M11<br>F5  | NA                  | NA          | NA          | NA   | [6]       |
| 7   | Mueller, T.      | 1998 | Germany | CSF           | ELISA      | 22         | 22  | 61 (1.5)    | NA         | NA         | NA         | NA                  | NA          | NA          | NA   | [7]       |
| 8   | Dobbs, R. J.     | 1999 | Britain | Serum         | ELISA      | 78         | 140 | 69.4 (12.3) | 61 (16.6)  | M43<br>F35 | M68<br>F72 | NA                  | NA          | 2-4         | NA   | [8]       |
| 9   | Wandinger, K. P. | 1999 | Germany | Blood         | ELISA      | 10         | 16  | 66.8 (11.8) | 61.2 (9.6) | M6<br>F4   | NA         | UKPDSBBC            | 1.9 (1.5)   | 1-3         | NA   | [9]       |
| 10  | Yang, Z. Z.      | 2001 | China   | CSF/<br>Serum | ELISA      | 18         | 16  | 59 (46-76)  | 33 (18-46) | M12<br>F6  | M9<br>F7   | Chinese<br>criteria | NA          | NA          | NA   | [10]      |
| 11  | Selikhova, M. V. | 2002 | Russia  | Plasma        | ELISA      | 27         | 15  | 69.7 (8.9)  | 62.5 (8.6) | NA         | NA         | NA                  | NA          | 40.2 (18.3) | NA   | [11]      |
| 12  | Rota, E.         | 2006 | Italy   | CSF/          | RIA        | 14         | 25  | 66 (6.4)    | 69 (8.6)   | M9         | M15        | NA                  | 3.0 (2.1)   | NA          | NA   | [12]      |

|    |                |      |                |               |                 |     |     |             |             |             |            |                      |           |           |             |      |
|----|----------------|------|----------------|---------------|-----------------|-----|-----|-------------|-------------|-------------|------------|----------------------|-----------|-----------|-------------|------|
|    |                |      |                | Serum         |                 |     |     |             |             | F5          | F10        |                      |           |           |             |      |
| 13 | Rentzos, M.    | 2007 | Greece         | Serum         | ELISA           | 41  | 19  | 67.5 (8.1)  | 65.8 (11.2) | M20         | M9         | Larsen JP's          | 4 (1.5-7) | 2.5 (1-4) | 25 (18-32)  | [13] |
|    |                |      |                |               |                 |     |     |             |             | F21         | F10        | criteria             |           |           |             |      |
| 14 | Brodacki, B.   | 2008 | Poland         | Serum         | CBA             | 55  | 20  | NA          | NA          | NA          | NA         | UKPDSBBC             | NA        | 2.6 (0.2) | 42 (18)     | [14] |
| 15 | Chen, H. L.    | 2008 | USA            | Plasma        | NA              | 84  | 165 | 67.2 (7.6)  | 67.2 (7.5)  | NA          | NA         | Medical records      | NA        | NA        | NA          | [15] |
| 16 | Choi, C.       | 2008 | Korea          | CSF/<br>Serum | Luminex<br>Xmap | 8   | 13  | 73.0 (8.6)  | 68.5 (7.2)  | M0<br>F8    | M5<br>F8   | UKPDSBBC             | NA        | NA        | NA          | [16] |
| 17 | Xu, J. P.      | 2008 | China          | Serum         | RIA             | 51  | 35  | 67 (12.1)   | 57.7 (11.1) | M29<br>F22  | NA         | Chinese criteria     | NA        | NA        | NA          | [17] |
| 18 | Dufek, M.      | 2009 | Czech Republic | Serum         | EIAs            | 29  | -   | 68.2 (5.4)  | -           | M21<br>F8   | -          | UKPDSBBC             | 9.3 (4.4) | 3 (0.6)   | 19 (12.2)   | [18] |
| 19 | Hofmann, K. W. | 2009 | Brazil         | Serum         | ELISA           | 40  | 23  | 66.0 (10.7) | 60.0 (7.8)  | M22<br>F18  | M15<br>F8  | UKPDSBBC             | 5.8 (5.9) | NA        | NA          | [19] |
| 20 | Rentzos, M.    | 2009 | Greece         | Serum         | ELISA           | 41  | 19  | 67.5 (8.1)  | 65.8 (11.2) | M20<br>F21  | M9<br>F10  | Larsen JP's criteria | 4 (1.5-7) | 2.5 (1-4) | 25 (18-32)  | [20] |
| 21 | Scalzo, P.     | 2009 | Brazil         | Serum         | ELISA           | 46  | 23  | 61.9 (10.8) | 65.8 (8.9)  | M23<br>F23  | M8<br>F15  | NA                   | 7.5 (4.6) | 2 (1-4)   | 34.9 (22.4) | [21] |
| 22 | Tuncel, D.     | 2009 | Turkey         | Serum         | Chemical        | 212 | 119 | 68.7 (9.3)  | 66.6 (12.6) | M77<br>F135 | M59<br>F60 | UKPDSBBC             | 2.1 (1.1) | NA        | NA          | [22] |
| 23 | Menza, M.      | 2010 | USA            | Plasma        | ELISA           | 52  | -   | 62.8        | -           | M25<br>F27  | -          | UKPDSBBC             | 6.6       | 2.2       | NA          | [23] |
| 24 | Pålhagen, S.   | 2010 | Sweden         | CSF           | EIAs            | 25  | -   | 64.9 (8.4)  | -           | M14<br>F11  | -          | UKPDSBBC             | 8.1 (3.8) | 2.0 (0.4) | 23.6 (10.3) | [24] |
| 25 | Scalzo, P.     | 2010 | Brazil         | Serum         | ELISA           | 44  | 22  | NA          | NA          | NA          | NA         | NA                   | NA        | NA        | NA          | [25] |
| 26 | Varani, K.     | 2010 | Italy          | Serum         | ELISA           | 56  | 60  | 74.2 (8.1)  | 71.4 (8.3)  | M38         | M40        | NA                   | NA        | NA        | NA          | [26] |

|    |                 |      |         |               |                 |     |          |             |             |                   |            |                     |             |           |             |      |
|----|-----------------|------|---------|---------------|-----------------|-----|----------|-------------|-------------|-------------------|------------|---------------------|-------------|-----------|-------------|------|
| 27 | Hassin-Baer, S. | 2011 | Israel  | Plasma        | Chemical        | 73  | -        | 68.8 (11.5) | -           | F18<br>M46<br>F27 | F20<br>-   | UKPDSBBC            | 6.7 (4.7)   | 2 (2-3)   | 24.2 (12.3) | [27] |
| 28 | Lee, H. W.      | 2011 | Korea   | Plasma        | ELISA           | 66  | 41       | 65.8 (8.8)  | 64.7 (6.7)  | M26<br>F40        | M15<br>F26 | UKPDSBBC            | NA          | NA        | NA          | [28] |
| 29 | Scalzo, P.      | 2011 | Brazil  | Serum         | ELISA           | 47  | 23       | 61.8 (10.7) | 65.7 (8.8)  | M24<br>F23        | M8<br>F15  | NA                  | 7.6 (4.5)   | 2 (1-4)   | 34.5 (22.3) | [29] |
| 30 | Shi, M.         | 2011 | USA     | CSF           | Luminex<br>Xmap | 126 | 137      | 63.8 (10.4) | 58.9 (18.4) | M88<br>F29        | M52<br>F53 | UKPDSBBC            | NA          | NA        | NA          | [30] |
| 31 | Andican, G.     | 2012 | Turkey  | Plasma        | ELISA           | 45  | 25       | 63.6 (13.5) | 60.2 (12.5) | M25<br>F20        | M15<br>F10 | NA                  | 6.4 (4.3)   | 6.4 (4.3) | NA          | [31] |
| 32 | Gruden, M. A.   | 2012 | Russia  | Serum         | ELISA           | 32  | 26       | 60.8 (2.0)  | 63.0 (3.0)  | M20<br>F12        | M19<br>F7  | NA                  | 1-5         | 2.1 (0.6) | 23.3 (1.9)  | [32] |
| 33 | Koziorowski, D. | 2012 | Poland  | Serum         | Luminex<br>Xmap | 60  | 24       | 59 (15.5)   | 64 (5.8)    | M30<br>F30        | M12<br>F12 | UKPDSBBC            | 11.3 (10.7) | 2.4 (0.8) | NA          | [33] |
| 34 | Lindqvist, D.   | 2012 | Sweden  | Serum         | MSD             | 86  | 40       | 64.2 (10.8) | 64.8 (9.0)  | M51<br>F35        | M14<br>F26 | NA                  | 6.9 (6.2)   | 1.9 (0.9) | 17.3 (10.4) | [34] |
| 35 | Liu, J.         | 2012 | China   | Serum         | Nephelometric   | 20  | 20       | 62 (5.6)    | 60.2 (8.2)  | M12<br>F8         | M13<br>F7  | Chinese<br>criteria | 9.8 (2.9)   | NA        | NA          | [35] |
| 36 | Mahlknecht, P.  | 2012 | Austria | Serum         | ELISA           | 20  | 30       | 67 (52-81)  | 65 (56-80)  | M8<br>F12         | M12<br>F18 | NA                  | 6 (1-37)    | 2 (1-4)   | NA          | [36] |
| 37 | Sathe, K.       | 2012 | Britain | CSF/<br>Serum | ELISA           | 82  | 64       | 69 (8)      | 67 (9)      | M40<br>F42        | M23<br>F41 | UKPDSBBC            | 8 (6)       | 2 (1-4)   | NA          | [37] |
| 38 | Ton, T. G.      | 2012 | USA     | Blood         | ELISA           | 60  | 567<br>4 | NA          | NA          | NA                | NA         | Medical<br>records  | NA          | NA        | NA          | [38] |

|    |               |      |        |        |               |     |     |             |             |              |             |                       |            |           |             |      |
|----|---------------|------|--------|--------|---------------|-----|-----|-------------|-------------|--------------|-------------|-----------------------|------------|-----------|-------------|------|
| 39 | Zhao, X. Q.   | 2012 | China  | Serum  | ELISA         | 40  | 30  | 67.3 (9.4)  | 62.1 (10.4) | M23<br>F17   | M17<br>F13  | Chinese<br>criteria   | 4.7 (3.8)  | 1-5       | 6.5 (9.7)   | [39] |
| 40 | Lindqvist, D. | 2013 | Sweden | CSF    | MSD           | 71  | 33  | 64.1 (10.5) | 65.8 (8.8)  | M14<br>F19   | M44<br>F27  | NA                    | 6.4 (5.6)  | 1.9 (0.8) | 18 (10-25)  | [40] |
| 41 | Olsson, B.    | 2013 | Sweden | CSF    | ELISA         | 50  | 37  | 60.4 (9.6)  | 69.2 (7.3)  | M36<br>F14   | M13<br>F24  | Gelb DJ's<br>criteria | 11.1 (7.4) | NA        | NA          | [41] |
| 42 | Rocha, N. P.  | 2014 | Brazil | Plasma | ELISA         | 40  | 25  | 68.7 (10.1) | 65.2 (8.8)  | M27F<br>13   | M19<br>F6   | UKPDSBBC              | 5.5 (4.1)  | 2.4 (0.7) | 34.6 (18.4) | [42] |
| 43 | Rocha, N. P.  | 2014 | Brazil | Plasma | ELISA         | 40  | 25  | 68.7 (10.1) | 65.2 (8.8)  | M27<br>F13   | M19<br>F6   | UKPDSBBC              | 5.5 (4.1)  | 2.4 (0.7) | 34.6 (18.4) | [43] |
| 44 | Song, I. U.   | 2014 | Korea  | Serum  | NA            | 435 | 221 | 69.4 (9.2)  | 68.5 (11.5) | M147<br>F278 | M95<br>F126 | UKPDSBBC              | 3.3 (2.8)  | 2.2 (1.0) | NA          | [44] |
| 45 | Sawada, H.    | 2014 | Japan  | Plasma | NA            | 111 | -   | 69.7 (7.8)  | -           | M46<br>F65   | -           | UKPDSBBC              | 8.0 (4.5)  | NA        | 22.2 (11.4) | [45] |
| 46 | Tang, P.      | 2014 | China  | Serum  | ELISA         | 78  | 80  | 76.3 (5.0)  | 75.4 (4.4)  | M60<br>F18   | M59<br>F21  | UKPDSBBC              | 5.5 (5.2)  | 2.6 (1.3) | 27.2 (12.4) | [46] |
| 47 | Wang, Y. R.   | 2014 | China  | Serum  | ELISA         | 56  | 120 | 69.4 (7.4)  | 69.5 (9.3)  | M21<br>F35   | M59<br>F61  | UKPDSBBC              | 3 (3)      | 2 (1.5)   | NA          | [47] |
| 48 | Yu, S. Y.     | 2014 | China  | CSF    | ELISA         | 26  | 31  | 57.4 (10.8) | 52.2 (8.6)  | M13<br>F13   | M17<br>F14  | UKPDSBBC              | 2 (2-5)    | 2 (1-3)   | NA          | [48] |
| 49 | Akil, E.      | 2015 | Turkey | Serum  | Nephelometric | 51  | 50  | 69.5 (9.3)  | 65.9 (10.1) | M29<br>F22   | M26<br>F24  | UKPDSBBC              | NA         | NA        | NA          | [49] |
| 50 | Bu, X. L.     | 2015 | China  | Serum  | ELISA         | 131 | 141 | 67 (10)     | 68 (9)      | M68<br>F63   | M75<br>F66  | UKPDSBBC              | 3.6 (3.4)  | 2.2 (0.9) | NA          | [50] |
| 51 | Hu, Y.        | 2015 | China  | CSF    | ELISA         | 84  | 31  | NA          | NA          | NA           | NA          | UKPDSBBC              | NA         | NA        | NA          | [51] |
| 52 | Jiang, Q. W.  | 2015 | China  | Plasma | ELISA         | 59  | 54  | 64.4 (8.1)  | 65.0 (6.9)  | M41          | M37         | UKPDSBBC              | 3.3 (3.1)  | 1.4 (0.5) | 14.6 (7.2)  | [52] |

|    |                      |      |         |        |               |     |    |            |             |                   |                   |          |           |           |             |      |
|----|----------------------|------|---------|--------|---------------|-----|----|------------|-------------|-------------------|-------------------|----------|-----------|-----------|-------------|------|
| 53 | Magdalinou, N. K.    | 2015 | Britain | CSF    | MSD           | 31  | 30 | 67 (64-70) | 60 (56-63)  | F18<br>M20<br>F11 | F17<br>M30<br>F30 | NA       | NA        | NA        | NA          | [53] |
| 54 | Martín de Pablos, A. | 2015 | Spain   | CSF    | ELISA         | 37  | 21 | 63.4 (0.9) | 67.9 (10)   | M14<br>F15        | M13<br>F8         | NA       | NA        | 1-4       | NA          | [54] |
| 55 | Park, S. J.          | 2015 | Korea   | Serum  | NA            | 112 | 94 | 72.9 (5.7) | 71.6 (7.9)  | M36<br>F76        | M45<br>F49        | UKPDSBBC | 2.6 (2.5) | NA        | NA          | [55] |
| 56 | Umemura, A.          | 2015 | Japan   | Serum  | NA            | 375 | 65 | 69.3       | NA          | NA                | NA                | UKPDSBBC | NA        | NA        | NA          | [56] |
| 57 | Wang, Y. H.          | 2015 | China   | Plasma | Nephelometric | 62  | 38 | 65.8 (9.3) | 69.4 (10.1) | M27<br>F35        | M18<br>F20        | UKPDSBBC | 6.4 (1.2) | 2.5 (0.8) | 20.6 (6.8)  | [57] |
| 58 | Wennstrom, M.        | 2015 | USA     | CSF    | ELISA         | 61  | -  | 68.4 (9.2) | -           | M36F<br>25        | -                 | NINDS    | NA        | NA        | NA          | [58] |
| 59 | Csencsits-Smith, K.  | 2016 | USA     | Serum  | Millipore     | 24  | 15 | 64.2 (8.6) | 56.8 (9.2)  | M16<br>F8         | M10<br>F5         | UKPDSBBC | 5.2 (3.3) | 1.6 (0.8) | 29.1 (14.8) | [59] |
| 60 | da Silva, D. J.      | 2016 | Brazil  | Serum  | CBA           | 21  | 21 | 59 (51-68) | 59 (46-69)  | M13<br>F8         | M13<br>F8         | UKPDSBBC | 6 (1-20)  | 2 (2-3)   | 19 (9.5-40) | [60] |
| 61 | de Farias, C. C.     | 2016 | Brazil  | Blood  | Nephelometric | 56  | 54 | 70.3 (8.9) | 69.7 (8.8)  | M27<br>F29        | M24<br>F30        | UKPDSBBC | 6.5 (4.2) | NA        | NA          | [61] |
| 62 | Gupta, V.            | 2016 | India   | Serum  | ELISA         | 81  | 83 | 58.5 (8.8) | 57.6 (7.9)  | M60<br>F21        | M59<br>F24        | UKPDSBBC | 3.2 (2.9) | NA        | NA          | [62] |
| 63 | Hall, S.             | 2016 | Sweden  | CSF    | ELISA         | 63  | 21 | 64.7 (9.4) | 65.7 (6.8)  | M42<br>F21        | M8<br>F13         | NA       | 5.5 (4.0) | 2.0 (0.7) | 19.2 (9.4)  | [63] |
| 64 | Li, Z. J.            | 2016 | China   | Serum  | ELISA         | 65  | 52 | 64.6 (8.2) | NA          | M36<br>F29        | NA                | UKPDSBBC | 2.7 (1.0) | NA        | 20.1 (5.6)  | [64] |
| 65 | Lue, L. F.           | 2016 | USA     | Plasma | Multiplex     | 74  | -  | 73.1 (1.3) | -           | M48<br>F26        | -                 | Clinical | NA        | NA        | 25.5 (9.5)  | [65] |

|    |                          |      |         |                |                 |     |    |             |             |             |            |                        |           |             |             |      |
|----|--------------------------|------|---------|----------------|-----------------|-----|----|-------------|-------------|-------------|------------|------------------------|-----------|-------------|-------------|------|
| 66 | Pereira, J. R.           | 2016 | Brazil  | Serum          | ELISA           | 44  | -  | 65.1 (10.9) | -           | M33<br>F11  | -          | UKPDSBBC               | 6.4 (3.7) | NA          | 35.8 (10.3) | [66] |
| 67 | Wang, X. M.              | 2016 | China   | Blood          | ELISA           | 62  | 62 | 65.0 (7.2)  | 64.6 (7.5)  | M38<br>F24  | M36<br>F26 | Tolosa E's<br>criteria | NA        | NA          | NA          | [67] |
| 68 | Williams-<br>Gray, C. H. | 2016 | British | Serum          | V-PLEX          | 230 | -  | 66.4 (9.5)  | -           | M142<br>F78 | -          | UKPDSBBC               | 0.6 (0.5) | NA          | 27.9 (11.5) | [68] |
| 69 | Delgado-<br>Alvarado, M. | 2017 | Spain   | CSF/<br>Plasma | Luminex<br>Xmap | 39  | 38 | 71.3 (6.2)  | 68.1 (4.9)  | M28<br>F11  | M20<br>F18 | MDS criteria           | 7.9 (4.1) | 2.3 (0.5)   | 22.2 (7.9)  | [69] |
| 70 | Eidson, L. N.            | 2017 | USA     | CSF/<br>Serum  | MSD             | 12  | 6  | 51.8 (8.0)  | 53.3 (11.4) | M8<br>F4    | M4<br>F2   | NA                     | NA        | NA          | NA          | [70] |
| 71 | Bagheri, V.              | 2018 | Iran    | Serum          | ELISA           | 30  | 40 | 68.7 (4.1)  | 69.2 (9.3)  | M19<br>F11  | M26<br>F14 | MDS criteria           | 4.2 (3.0) | NA          | 22.1 (8.6)  | [71] |
| 72 | Dos Santos,<br>M. C. T.  | 2018 | Germany | CSF            | Millipore       | 80  | 80 | 64.3 (9.8)  | 62.7 (10.2) | M53<br>F26  | M51<br>F29 | UKPDSBBC               | NA        | NA          | NA          | [72] |
| 73 | Hall, S.                 | 2018 | Sweden  | CSF            | MSD             | 131 | 50 | 64.9 (10.6) | 65.3 (8.6)  | M80<br>F51  | M22<br>F28 | NINDSDC                | 5.5 (4.8) | 2.0 (0.8)   | 17.1 (10.5) | [73] |
| 74 | Ilyechova, E.<br>Y.      | 2018 | Russia  | Serum          | ELISA           | 50  | 50 | 64 (57-72)  | 60 (55-74)  | M21<br>F29  | M24<br>F26 | UKPDSBBC               | NA        | 3 (1.5-2.5) | 28 (26-29)  | [74] |
| 75 | Karpenko, M.<br>N.       | 2018 | Sweden  | Serum          | ELISA           | 117 | 60 | 65 (57-73)  | 65 (59-72)  | M49<br>F68  | M29<br>F31 | Medical<br>records     | 5 (2-16)  | 3 (1.5-2.5) | 30 (25-41)  | [75] |
| 76 | Kim, R.                  | 2018 | Korea   | Serum          | MSD             | 58  | 20 | 62.4 (8.1)  | 61.1 (10.3) | M27<br>F31  | M9<br>F11  | UKPDSBBC               | 1.2 (0.9) | 1.8 (0.7)   | 26.7 (10.5) | [76] |
| 77 | Kouchaki, E.             | 2018 | Iran    | Serum          | ELISA           | 43  | 40 | 65.1 (9.7)  | 66.7 (12.7) | M28<br>F15  | M24<br>F16 | UKPDSBBC               | 5.6 (4.4) | 2.2 (0.7)   | NA          | [77] |
| 78 | Kouchaki, E.             | 2018 | Iran    | Serum          | ELISA           | 83  | 83 | 65.7 (11.2) | 64.2 (12.6) | M52<br>F31  | M38<br>F45 | UKPDSBBC               | 4.9 (3.9) | 2.2 (0.7)   | NA          | [78] |

|    |                          |      |                 |        |               |     |    |             |             |            |            |                  |           |           |             |      |
|----|--------------------------|------|-----------------|--------|---------------|-----|----|-------------|-------------|------------|------------|------------------|-----------|-----------|-------------|------|
| 79 | Li, D. H.                | 2018 | China           | Blood  | ELISA         | 23  | 24 | NA          | NA          | NA         | NA         | MDS criteria     | 3.5 (3.3) | 1.8 (0.7) | 20.1 (13.3) | [79] |
| 80 | Moghaddam, H. S.         | 2018 | Iran            | CSF    | NA            | 109 | 84 | 69.7 (6.5)  | 67.1 (7.2)  | M66<br>F43 | M39<br>F45 | NA               | NA        | NA        | NA          | [80] |
| 81 | Pochmann, D.             | 2018 | Brazil          | Plasma | ELISA         | 12  | 14 | 65.1 (6.7)  | 60.2 (10.3) | M6<br>F6   | M3<br>F11  | NA               | NA        | NA        | 15.8 (7.5)  | [81] |
| 82 | Rocha, N. P.             | 2018 | Brazil          | Plasma | CBA           | 40  | 25 | 68.7 (10.1) | 65.2 (8.8)  | M27<br>F13 | M19<br>F6  | UKPDSBBC         | NA        | 2.4 (0.7) | 34.6 (18.4) | [82] |
| 83 | Rocha Sobrinho, H. M. D. | 2018 | Brazil          | Serum  | NA            | 26  | 26 | 66 (35-76)  | 65 (34- 75) | M20<br>F6  | M20<br>F6  | UKPDSBBC         | 13 (5-20) | 2 (2-3)   | 20 (19-46)  | [83] |
| 84 | Solmaz, V.               | 2018 | Turkey          | Blood  | Nephelometric | 101 | 60 | 66.4 (10.9) | 63.3 (8.9)  | M58<br>F43 | NA         | UKPDSBBC         | NA        | NA        | NA          | [84] |
| 85 | Starhof, C.              | 2018 | Denmark         | CSF    | MSD           | 46  | 31 | 64.5 (11.5) | 45.5 (17.7) | M30<br>F16 | M15<br>F16 | NA               | 7.0 (3.8) | 2 (2)     | NA          | [85] |
| 86 | Veselý, B.               | 2018 | Slovak Republic | Serum  | ECLIA         | 47  | -  | 65 (7.8)    | -           | M28F<br>19 | -          | UKPDSBBC         | 7.7 (4.2) | NA        | NA          | [86] |
| 87 | Yang, Y.                 | 2018 | China           | Serum  | ELISA         | 72  | 20 | 64.2 (5.4)  | 62.2 (3.8)  | M38<br>F34 | M10<br>F10 | Chinese criteria | NA        | NA        | NA          | [87] |
| 88 | Ahmadi Rastegar, D.      | 2019 | Australia       | Serum  | Multiplex     | 65  | -  | NA          | -           | NA         | -          | UKPDSBBC         | NA        | NA        | NA          | [88] |
| 89 | Alrafiah, A.             | 2019 | Arabia          | Serum  | Milliplex     | 26  | 24 | 60.4 (11.5) | 60.2 (9.2)  | M20<br>F6  | M18<br>F6  | NA               | NA        | NA        | NA          | [89] |
| 90 | Álvarez-Luquín, D. D.    | 2019 | Mexico          | Plasma | ELISA         | 32  | 22 | 60.8 (10.2) | 55.6 (10.2) | NA         | NA         | UKPDSBBC         | NA        | NA        | NA          | [90] |
| 91 | Baran, A.                | 2019 | Turkey          | Serum  | Nephelometric | 30  | 30 | 70.7 (9.6)  | 66.8 (9.0)  | M16<br>F14 | M14<br>F16 | UKPDSBBC         | 5.9 (4.7) | 3.3 (1.3) | NA          | [91] |



|     |                       |      |         |               |                   |            |            |                           |                           |                    |                    |              |            |           |             |       |
|-----|-----------------------|------|---------|---------------|-------------------|------------|------------|---------------------------|---------------------------|--------------------|--------------------|--------------|------------|-----------|-------------|-------|
| 92  | Compta, Y.            | 2019 | Spain   | CSF           | Luminex<br>Xmap   | 17         | 14         | 65 (63-67)                | 68 (61-73)                | M12<br>F7          | M8<br>F7           | NA           | 27 (18-33) | NA        | NA          | [92]  |
| 93  | Green, H. F.          | 2019 | Sweden  | Plasma        | SIMOA             | 63         | 43         | 69.9 (8.1)                | 68.2 (7.1)                | M34<br>F32         | M24<br>F21         | NA           | 5 (0-26)   | 2 (1-5)   | 28.9 (13.3) | [93]  |
| 94  | King, E.              | 2019 | Britain | Serum         | MSD               | 112        | 64         | 69.5 (6.7)                | 69.5 (0.8)                | M44<br>F68         | M34<br>F30         | UKPDSBBC     | NA         | NA        | 22.8 (12.1) | [94]  |
| 95  | Lian, T. H.           | 2019 | China   | CSF/<br>Serum | ELISA             | 113        | 35         | 59.2 (9.6)                |                           | M62<br>F51         | NA                 | MDS criteria | NA         | NA        | NA          | [95]  |
| 96  | Lin, C. H.            | 2019 | Taiwan  | Plasma        | Procarta<br>Plex  | 120<br>/80 | 120<br>/77 | 62.3 (7.8)/<br>64.0 (8.8) | 61.8 (8.3)/<br>62.1 (4.7) | F45/<br>M43<br>F37 | F48/<br>M36<br>F41 | UKPDSBBC     | 7.5 (5.2)  | 1.8 (0.9) | 17.4 (9.6)  | [96]  |
| 97  | Mollenhauer,<br>B.    | 2019 | Germany | Blood         | NA                | 135        | 107        | 64.5 (9.8)                | 64.7 (6.9)                | NA                 | NA                 | UKPDSBBC     | NA         | NA        | 22.8 (12.1) | [97]  |
| 98  | Perner, C.            | 2019 | Germany | Plasma        | ELISA             | 33         | 33         | 69.6 (10.4)               | 63.7 (11.7)               | M16<br>F17         | M20<br>F13         | UKPDSBBC     | 10.1 (5.1) | 3 (1)     | 34.5 (15.1) | [98]  |
| 99  | Santos-<br>Garcia, D. | 2019 | Spain   | Blood         | ELISA             | 153        | 65         | NA                        | 60.3 (6.1)                | NA                 | M37<br>F28         | NA           | NA         | NA        | NA          | [99]  |
| 100 | Yazar, T.             | 2019 | Turkey  | Serum         | Nephelom<br>etric | 151        | 150        | 72.6 (7.5)                | 73.9 (4.8)                | NA                 | NA                 | UKPDSBBC     | NA         | NA        | NA          | [100] |
| 101 | Calvani, R.           | 2020 | Italy   | Serum         | Luminex<br>Xmap   | 20         | 30         | 73.1 (10.2)               | 74.6 (4.3)                | M11<br>F9          | M14<br>F16         | UKPDSBBC     | 8.2 (5.8)  | NA        | NA          | [101] |
| 102 | Chatterjee, K.        | 2020 | India   | Serum         | ELISA             | 27         | 15         | 62.5 (7.7)                | 62.7 (6.9)                | M14<br>F13         | M10<br>F5          | UKPDSBBC     | 6.7 (3.4)  | 2 (0.8)   | 25.8 (15.1) | [102] |
| 103 | Fan, Z                | 2020 | China   | Plasma        | MSD               | 43         | 24         | 58.4 (1.4)                | 57.9 (1.6)                | M24<br>F19         | M13<br>F11         | UKPDSBBC     | 2.3 (0.3)  | 1.9 (0.1) | 31.4 (2.1)  | [103] |

|     |                             |      |                 |                |                           |           |           |                           |                           |                    |                           |              |             |           |             |       |
|-----|-----------------------------|------|-----------------|----------------|---------------------------|-----------|-----------|---------------------------|---------------------------|--------------------|---------------------------|--------------|-------------|-----------|-------------|-------|
| 104 | Iwaoka, K.                  | 2020 | Japan           | CSF            | ELISA                     | 20        | 13        | 69.0 (6.4)                | 69.0 (16.7)               | M9<br>F11          | M9<br>F4                  | UKPDSBBC     | 29.6 (20.3) | 2.5 (0.5) | 25.2 (9.5)  | [104] |
| 105 | Jin, H.                     | 2020 | China           | Serum          | NA                        | 183       | 88        | 59.7 (10.6)               | 62.1 (7.1)                | NA                 | NA                        | UKPDSBBC     | NA          | 2.0 (0.7) | 24.3 (12.7) | [105] |
| 106 | Kiçik, A.                   | 2020 | Turkey          | Serum          | ELISA                     | 61        | -         | 62.6 (8.9)                | -                         | M17<br>F37         | -                         | UKPDSBBC     | 6.2 (3.6)   | 1.8 (0.5) | 28.7 (11.6) | [106] |
| 107 | Kwiaterek-<br>Majkusiak, J. | 2020 | Poland          | Serum          | ELISA                     | 47        | 28        | 60.2 (10.4)               | 58.4 (2.4)                | M26<br>F21         | M14<br>F14                | UKPDSBBC     | 8.4 (7.7)   | NA        | 12.6 (11.0) | [107] |
| 108 | Majbour, N.<br>K.           | 2020 | Norway          | CSF            | Luminex<br>Xmap           | 60        | 43        | 57 (10)                   | 49 (18)                   | M36<br>F24         | M19<br>F24                | NA           | NA          | NA        | NA          | [108] |
| 109 | Martin-Ruiz,<br>C.          | 2020 | Britain         | Serum          | MSD                       | 154       | 99        | 67 (60-82)                | 68 (63-82)                | M54<br>F100        | M54<br>F45                | UKPDSBBC     | 0.4 (0.2-1) | 2 (2-3)   | 26 (17-47)  | [109] |
| 110 | Miliukhina, I.<br>V.        | 2020 | Russia          | Plasma         | ELISA/Lu<br>minex<br>Xmap | 23/<br>28 | 29/<br>28 | 66.5 (2.3)/<br>70.7 (1.6) | 68.5 (2.9)/<br>67.5 (1.4) | M10F<br>M12F<br>16 | M16<br>F13/<br>M15<br>F13 | MDS criteria | NA          | NA        | NA          | [110] |
| 111 | Moghadam-<br>Ahmadi, A.     | 2020 | Iran            | Serum          | ELISA                     | 30        | 30        | 68.7 (4.1)                | 69.2 (9.3)                | M19<br>F11         | M26<br>F14                | UKPDSBBC     | 4.3 (3.0)   | NA        | NA          | [111] |
| 112 | Lian, T. H.                 | 2020 | China           | CSF            | ELISA                     | 86        | -         | 62.2 (9.5)                | -                         | M46<br>F40         | -                         | UKPDSBBC     | 3.2 (2.5)   | NA        | 27.1 (16.2) | [112] |
| 113 | Peng, G.                    | 2020 | China           | CSF/<br>Plasma | ELISA                     | 55        | 40        | 59.8 (8.9)                | 55.6 (13.4)               | M27<br>F28         | M21<br>F19                | UKPDSBBC     | 3.6 (1-15)  | 2.0 (1-3) | 22.6 (12.2) | [113] |
| 114 | Sankowski,<br>B.            | 2020 | Poland          | Serum          | Nephelom<br>etric         | 18        | 9         | 59 (10)                   | 42 (10)                   | M8<br>F10          | M4<br>F5                  | UKPDSBBC     | 8.1 (4.4)   | 2.9 (0.6) | 40 (18)     | [114] |
| 115 | Santaella, A.               | 2020 | Netherla<br>nds | CSF            | Multiplex<br>PEA          | 44        | 25        | 57.9 (9.9)                | 64.5 (10.3)               | M28<br>F16         | M11<br>F14                | MDS criteria | 3.5 (2.9)   | 2.0 (0.6) | 28.2 (13.8) | [115] |

|     |                       |      |             |                |               |     |     |             |             |              |             |              |             |           |             |       |
|-----|-----------------------|------|-------------|----------------|---------------|-----|-----|-------------|-------------|--------------|-------------|--------------|-------------|-----------|-------------|-------|
| 116 | Santaella, A.         | 2020 | Netherlands | CSF            | ELISA         | 46  | -   | 57.5 (10.0) | -           | M30<br>F16   | -           | MDS criteria | 3.0 (0.8)   | 2.0 (0.7) | 27.3 (12.7) | [116] |
| 117 | Szymura, J.           | 2020 | Poland      | Plasma         | ELISA         | 29  | 32  | 65.7 (7.5)  | 66.5 (3.2)  | M19<br>F19   | M20<br>F12  | NA           | NA          | 2-3       | NA          | [117] |
| 118 | Usenko, T. S.         | 2020 | Russia      | Plasma         | Milliplex     | 29  | 19  | 67 (45-73)  | 64 (35-86)  | M14<br>F15   | M6<br>F13   | MDS criteria | NA          | NA        | NA          | [118] |
| 119 | Yang, W. L.           | 2020 | China       | Plasma         | Nephelometric | 204 | 204 | 63.9 (11.2) | 63.8 (11.4) | M92<br>F112  | M92<br>F112 | MDS criteria | 4.8 (3.7)   | 2.4 (1.0) | 21.3 (11.1) | [119] |
| 120 | Yu, C. C.             | 2020 | Taiwan      | Serum          | ELISA         | 33  | 27  | 63.1 (9.1)  | 63.1 (9.1)  | M11<br>F22   | M7<br>F20   | UKPDSBBC     | 24.7 (16.6) | 1.7 (0.9) | NA          | [120] |
| 121 | Bartl, M.             | 2021 | USA         | CSF            | ELISA         | 252 | 115 | 61 (9.8)    | 62 (11)     | M165<br>F87  | M74<br>F41  | MDS criteria | NA          | NA        | 20 (8.5)    | [121] |
| 122 | Chen, S. J.           | 2021 | China       | Plasma         | ELISA         | 248 | 149 | 68.9 (10.8) | 67.7 (9.9)  | M115<br>F133 | M69<br>F80  | UKPDSBBC     | 6.0 (4.0)   | 2.2 (1.0) | 21.6 (12.3) | [122] |
| 123 | Galper, J.            | 2021 | USA         | Plasma         | Bio-Plex      | 75  | 77  | 62.4 (1.2)  | 62.6 (1.2)  | M37<br>F38   | M40<br>F37  | NA           | NA          | NA        | 17.3 (1.2)  | [123] |
| 124 | Hatcher-Martin, J. M. | 2021 | USA         | CSF            | Milliplex     | 19  | 12  | 70.4 (10.1) | 74 (10.0)   | M12<br>F7    | M4<br>F8    | UKPDSBBC     | 9.6 (4.2)   | NA        | 23.8 (13.4) | [124] |
| 125 | Hu, Y.                | 2021 | China       | CSF/<br>Serum  | ELISA         | 139 | 30  | NA          | NA          | NA           | NA          | MDS criteria | NA          | NA        | NA          | [125] |
| 126 | Li, S. Y.             | 2021 | China       | Serum          | Nephelometry  | 148 | -   | 63.8 (11.1) | -           | M92F<br>56   | -           | UKPDSBBC     | 4.9 (4.3)   | NA        | NA          | [126] |
| 127 | Lin, Y. W.            | 2021 | China       | CSF/<br>Plasma | Nephelometric | 250 | 250 | 63.2 (11.2) | 63.3 (12.3) | M113<br>F87  | M10<br>F92  | MDS criteria | NA          | 2.3 (0.8) | 33.1 (11.6) | [127] |
| 128 | Mo, M. S.             | 2021 | China       | CSF            | ELISA         | 80  | 65  | 63.6 (8.5)  | 62.5 (6.9)  | M48          | M39         | UKPDSBBC     | 3.2 (1.5)   | 2.0 (0.4) | 30.4 (15.3) | [128] |

|     |                       |      |        |        |           |     |     |             |             |                 |                  |                  |             |             |             |       |
|-----|-----------------------|------|--------|--------|-----------|-----|-----|-------------|-------------|-----------------|------------------|------------------|-------------|-------------|-------------|-------|
| 129 | Muruzheva, Z. M.      | 2021 | Russia | Plasma | ELISA     | 12  | 12  | 63 (60-66)  | 63 (58-68)  | F32<br>M6<br>F6 | F26<br>M6<br>F6  | UKPDSBBC         | NA          | 2 (2-3)     | NA          | [129] |
| 130 | Roy, A.               | 2021 | India  | Serum  | ELISA     | 20  | 15  | 63.13 (2.2) | 62.7 (2.1)  | M13<br>F7       | M10<br>F5        | NA               | NA          | NA          | NA          | [130] |
| 131 | Solini, A.            | 2021 | Italy  | Plasma | ELISA     | 25  | 25  | 69.2 (6.9)  | 69.1 (7.7)  | M14<br>F11      | M10<br>F15       | UKPDSBBC         | 9.1 (3.2)   | 1.5 (0.6)   | 21.2 (9.0)  | [131] |
| 132 | Thaler, A.            | 2021 | Israel | Blood  | NA        | 105 | 220 | 66.5 (10.5) | 54.1 (11.3) | M72<br>F33      | M10<br>2<br>F118 | UKPDSBBC         | 2.6 (2.0)   | NA          | 23.0 (12.0) | [132] |
| 133 | Wu, H. C.             | 2021 | Taiwan | Plasma | ELISA     | 56  | 46  | 64.8 (10.2) | 65.9 (9.8)  | M32<br>F24      | M25<br>F21       | UKPDSBBC         | 6.0 (5.5)   | 2.6 (1.1)   | NA          | [133] |
| 134 | Wu, Z. B.             | 2021 | China  | Serum  | NA        | 58  | 60  | 65.2 (10.2) | 65.8 (4.9)  | M29<br>F29      | M33<br>F27       | UKPDSBBC         | 3 (1.5-7.0) | 2 (1.5-2.5) | NA          | [134] |
| 135 | Xia, D. H.            | 2021 | China  | CSF    | ELISA     | 34  | 29  | 61.8 (4.1)  | 60.5 (4.6)  | M19<br>F15      | M12<br>F17       | MDS criteria     | NA          | 2 (1.5-2.5) | NA          | [135] |
| 136 | Yin, Y. H.            | 2021 | China  | Serum  | ELISA     | 73  | 20  | 65.3 (5.3)  | 58.3 (6.3)  | M45<br>F28      | M12<br>F8        | Chinese criteria | 1-8         | NA          | NA          | [136] |
| 137 | Zhu, Y.               | 2021 | China  | Serum  | ELISA     | 46  | 42  | 69.5 (9.6)  | 69.7 (9.0)  | M28<br>F18      | M24<br>F18       | EFNS and MDSSES  | 3 (1-8)     | 2 (2-3)     | 26.4 (12.6) | [137] |
| 138 | Al-Huchaimi, S. H. K. | 2022 | Iraq   | Serum  | ELISA     | 35  | 45  | 55.5 (17.3) | 52.3 (16.5) | M19<br>F16      | M33<br>F12       | NA               | NA          | NA          | NA          | [138] |
| 139 | Diaz, K.              | 2022 | USA    | Serum  | Milliplex | 26  | 14  | 72.8 (7.1)  | 69.2 (5.4)  | M6<br>F8        | M11<br>F15       | NA               | 8.0 (5.4)   | 2.2 (0.5)   | 68.2 (17.1) | [139] |
| 140 | El-Kattan, M. M.      | 2022 | Egypt  | Serum  | ELISA     | 30  | 30  | 63 (8)      | 62 (4)      | M25<br>F5       | M25<br>F5        | MDS criteria     | 3 (1)       | NA          | NA          | [140] |

|     |              |      |         |               |               |     |    |             |             |            |            |              |            |            |             |       |
|-----|--------------|------|---------|---------------|---------------|-----|----|-------------|-------------|------------|------------|--------------|------------|------------|-------------|-------|
| 141 | Ghit, A.     | 2022 | Egypt   | Serum         | ELISA         | 20  | 15 | 61.7 (14.6) | 61.8 (4.9)  | M11<br>F9  | M10<br>F5  | UKPDSBBC     | 4.3 (4.0)  | NA         | NA          | [141] |
| 142 | Gupta, M.    | 2022 | India   | Serum         | ELISA         | 21  | -  | 57.9 (9.3)  | -           | M14<br>F7  | -          | NA           | 3.0 (1.6)  | NA         | NA          | [142] |
| 143 | Haji, S.     | 2022 | Japan   | Serum         | U-PLEX        | 29  | 41 | 67 (60-71)  | 67 (53-70)  | M17<br>F12 | M17<br>F24 | UKPDSBBC     | 43 (24-72) | 2 (2-3)    | NA          | [143] |
| 144 | Imarisio, A. | 2022 | Italy   | Plasma        | Elecsys       | 71  | 69 | 65.1 (10.5) | 71.7 (7.1)  | M46<br>F25 | M41<br>F28 | NA           | 5.2 (7.0)  | NA         | 16.6 (10.1) | [144] |
| 145 | Li, Y. Y.    | 2022 | China   | Plasma        | MSD           | 76  | 76 | 62.2 (7.5)  | 60.2 (8.2)  | M38<br>F38 | M48<br>F28 | MDS criteria | 4.9 (4.3)  | NA         | 28.4 (15.1) | [145] |
| 146 | Kaminska, M. | 2022 | Canada  | Serum         | Multiplex     | 66  | -  | 64.6 (9.8)  | -           | M41<br>F25 | -          | NA           | NA         | NA         | 22.0 (12.7) | [146] |
| 147 | Liu, J.      | 2022 | China   | Plasma        | Nephelometric | 145 | 72 | 64.9 (11.0) | 68.8 (9.5)  | M93<br>F52 | M35<br>F37 | MDS criteria | 4.0 (3.5)  | 2.0 (0.92) | 24.5 (13.7) | [147] |
| 148 | Lerche, S.   | 2022 | Germany | CSF           | Multiplex     | 68  | -  | NA          | -           | NA         | -          | UKPDSBBC     | NA         | NA         | NA          | [148] |
| 149 | Wang, L. X.  | 2022 | China   | Blood         | NA            | 93  | 36 | 61 (51-68)  | 61 (57-67)  | M60<br>F33 | M19<br>F17 | MDS criteria | NA         | 2(1-4)     | 20.2 (1.4)  | [149] |
| 150 | Xu, J. H.    | 2022 | China   | Serum         | Bio-Rad       | 32  | 30 | 61.2 (8.5)  | 55.8 (12.9) | M15<br>F17 | M13<br>F17 | MDS criteria | 5.4 (4.0)  | 2.6 (0.9)  | 44.7 (20.4) | [150] |
| 151 | Yuan, Y.     | 2022 | China   | CSF/<br>Serum | Chemical      | 13  | -  | NA          | -           | NA         | -          | MDS criteria | NA         | NA         | NA          | [151] |
| 152 | Zhao, Y.     | 2022 | China   | Plasma        | ELISA         | 36  | 36 | 66.5 (1.37) | 66.9 (1.5)  | M16<br>F20 | M18<br>F19 | NA           | 5.8 (0.7)  | NA         | NA          | [152] |

## References

1. Mogi, M., et al., *Tumor necrosis factor-alpha (TNF-alpha) increases both in the brain and in the cerebrospinal fluid from parkinsonian patients*. *Neurosci Lett*, 1994. **165**(1-2): p. 208-10.
2. BlumDegen, D., et al., *Interleukin-1 beta and interleukin-6 are elevated in the cerebrospinal fluid of Alzheimer's and de novo Parkinson's disease patients*. *Neuroscience Letters*, 1995. **202**(1-2): p. 17-20.
3. Klueter, H., et al., *Defective production of interleukin-2 in patients with idiopathic Parkinson's disease*. *Journal of the Neurological Sciences*, 1995. **133**(1-2): p. 134-139.
4. Mogi, M., et al., *Interleukin (IL)-1 beta, IL-2, IL-4, IL-6 and transforming growth factor-alpha levels are elevated in ventricular cerebrospinal fluid in juvenile parkinsonism and Parkinson's disease*. *Neuroscience Letters*, 1996. **211**(1): p. 13-16.
5. Stypula, G., et al., *Evaluation of interleukins, ACTH, cortisol and prolactin concentrations in the blood of patients with Parkinson's disease*. *Neuroimmunomodulation*, 1996. **3**(2-3): p. 131-134.
6. Vawter, M.P., et al., *TGF beta 1 and TGF beta 2 concentrations are elevated in Parkinson's disease in ventricular cerebrospinal fluid*. *Experimental Neurology*, 1996. **142**(2): p. 313-322.
7. Mueller, T., et al., *Interleukin-6 levels in cerebrospinal fluid inversely correlate to severity of Parkinson's disease*. *Acta Neurologica Scandinavica*, 1998. **98**(2): p. 142-144.
8. Dobbs, R.J., et al., *Association of circulating TNF-alpha and IL-6 with ageing and parkinsonism*. *Acta Neurologica Scandinavica*, 1999. **100**(1): p. 34-41.
9. Wandinger, K.P., et al., *Effects of amantadine treatment on in vitro production of interleukin-2 in de-novo patients with idiopathic Parkinson's disease*. *Journal Of Neuroimmunology*, 1999. **98**(2): p. 214-220.
10. Yang, Z.Z., P.L. Geng, and R.Y. Wang, *The concentration of IL-1beta, TNF-alpha and nitric oxide in serum and cerebrospinal fluid in the patients with some kind of CNS diseases and their significance*. *Xi'an Yike Daxue Xuebao*, 2001. **22**(1): p. 43-47.
11. Selikhova, M.V., et al., *Impaired production of plasma interleukin-6 in patients with Parkinson's disease*. *Bulletin Of Experimental Biology And Medicine*, 2002. **133**(1): p. 81-83.
12. Rota, E., et al., *Increased intrathecal TGF-beta1, but not IL-12, IFN-gamma and IL-10 levels in Alzheimer's disease patients*. *Neurological Sciences*, 2006. **27**(1): p. 33-39.
13. Rentzos, M., et al., *Circulating interleukin-15 and RANTES chemokine in Parkinson's disease*. *Acta Neurologica Scandinavica*, 2007. **116**(6): p. 374-379.
14. Brodacki, B.D., et al., *Serum interleukin (IL-2, IL-10, IL-6, IL-4), TNF alpha, and INF gamma concentrations are elevated in patients with atypical and idiopathic parkinsonism*. *Neuroscience Letters*, 2008. **441**(2): p. 158-162.

15. Chen, H.L., et al., *Peripheral inflammatory biomarkers and risk of Parkinson's disease*. American Journal Of Epidemiology, 2008. **167**(1): p. 90-95.
16. Choi, C., et al., *Multiplex analysis of cytokines in the serum and cerebrospinal fluid of patients with Alzheimer's disease by color-coded bead technology*. J Clin Neurol, 2008. **4**(2): p. 84-8.
17. P., X.J., et al., *The research on inflammatory factors of serum in the patient with Parkinson's disease*. Chinese Journal of Immunology, 2008. **24**(3): p. 266-268,270.
18. Dufek, M., et al., *Serum inflammatory biomarkers in Parkinson's disease*. Parkinsonism & Related Disorders, 2009. **15**(4): p. 318-320.
19. Hofmann, K.W., et al., *Interleukin-6 serum levels in patients with Parkinson's disease*. Neurochem Res, 2009. **34**(8): p. 1401-4.
20. Rentzos, M., et al., *Circulating interleukin-10 and interleukin-12 in Parkinson's disease*. Acta Neurologica Scandinavica, 2009. **119**(5): p. 332-337.
21. Scalzo, P., et al., *Increased serum levels of soluble tumor necrosis factor-alpha receptor-1 in patients with Parkinson's disease*. Journal Of Neuroimmunology, 2009. **216**(1-2): p. 122-125.
22. Tuncel, D., F. Inanc Tolun, and I. Toru, *Serum insulin-like growth factor-1 and nitric oxide levels in parkinson's disease*. Mediators of Inflammation, 2009. **2009**.
23. Menza, M., et al., *The Role of Inflammatory Cytokines in Cognition and Other Non-Motor Symptoms of Parkinson's Disease*. Psychosomatics, 2010. **51**(6): p. 474-479.
24. Pålhagen, S., et al., *Monoamines, BDNF, IL-6 and corticosterone in CSF in patients with Parkinson's disease and major depression*. J Neurol, 2010. **257**(4): p. 524-32.
25. Scalzo, P., et al., *Serum levels of interleukin-6 are elevated in patients with Parkinson's disease and correlate with physical performance*. Neurosci Lett, 2010. **468**(1): p. 56-8.
26. Varani, K., et al., *A2A adenosine receptor overexpression and functionality, as well as TNF-alpha levels, correlate with motor symptoms in Parkinson's disease*. Faseb j, 2010. **24**(2): p. 587-98.
27. Hassin-Baer, S., et al., *Is C-reactive protein level a marker of advanced motor and neuropsychiatric complications in Parkinson's disease?* J Neural Transm (Vienna), 2011. **118**(4): p. 539-43.
28. Lee, H.W., J. Choi, and K. Suk, *Increases of pentraxin 3 plasma levels in patients with Parkinson's disease*. Mov Disord, 2011. **26**(13): p. 2364-70.
29. Scalzo, P., et al., *Serum levels of chemokines in Parkinson's disease*. Neuroimmunomodulation, 2011. **18**(4): p. 240-4.
30. Shi, M., et al., *Cerebrospinal Fluid Biomarkers for Parkinson Disease Diagnosis and Progression*. Annals Of Neurology, 2011. **69**(3): p. 570-580.
31. Andican, G., et al., *Plasma oxidative and inflammatory markers in patients with idiopathic Parkinson's disease*. Acta Neurologica Belgica, 2012. **112**(2): p. 155-159.
32. Gruden, M.A., et al., *Correlation between protective immunity to alpha-synuclein aggregates, oxidative stress and inflammation*. Neuroimmunomodulation, 2012. **19**(6): p. 334-42.

33. Kozirowski, D., et al., *Inflammatory cytokines and NT-proCNP in Parkinson's disease patients*. Cytokine, 2012. **60**(3): p. 762-766.
34. Lindqvist, D., et al., *Non-Motor Symptoms in Patients with Parkinson's Disease - Correlations with Inflammatory Cytokines in Serum*. Plos One, 2012. **7**(10).
35. Liu, J., N.W. Yu, and X.J. Li, *Changes of humoral immune function in patients with Parkinson disease*. Journal of Clinical Neurology (China), 2012. **25**(4): p. 293-295.
36. Mahlknecht, P., et al., *An antibody microarray analysis of serum cytokines in neurodegenerative Parkinsonian syndromes*. Proteome Science, 2012. **10**.
37. Sathe, K., et al., *S100B is increased in Parkinson's disease and ablation protects against MPTP-induced toxicity through the RAGE and TNF- $\alpha$  pathway*. Brain, 2012. **135**(Pt 11): p. 3336-47.
38. Ton, T.G., et al., *Markers of inflammation in prevalent and incident Parkinson's disease in the Cardiovascular Health Study*. Parkinsonism Relat Disord, 2012. **18**(3): p. 274-8.
39. Zhao, X.Q., P. Niu, and C. Su, *The Parkinson patients serum levels of TNF- $\alpha$ ,sTNFR1,sTNFR2 detection and clinical significance*. Journal of Apoplexy and Nervous Diseases, 2012. **29**(10): p. 900-903.
40. Lindqvist, D., et al., *Cerebrospinal fluid inflammatory markers in Parkinson's disease - Associations with depression, fatigue, and cognitive impairment*. Brain Behavior And Immunity, 2013. **33**: p. 183-189.
41. Olsson, B., et al., *The glial marker YKL-40 is decreased in synucleinopathies*. Mov Disord, 2013. **28**(13): p. 1882-5.
42. Rocha, N.P., et al., *Cognitive Status Correlates with CXCL10/IP-10 Levels in Parkinson's Disease*. Parkinsons Disease, 2014. **2014**.
43. Rocha, N.P., et al., *Plasma levels of soluble tumor necrosis factor receptors are associated with cognitive performance in Parkinson's disease*. Movement Disorders, 2014. **29**(4): p. 527-531.
44. Song, I.U., et al., *Serum hs-CRP levels are increased in de Novo Parkinson's disease independently from age of onset*. Eur Neurol, 2014. **72**(5-6): p. 285-9.
45. Sawada, H., et al., *Subclinical Elevation of Plasma C-Reactive Protein and Illusions/Hallucinations in Subjects with Parkinson's Disease: Case-control Study*. Plos One, 2014. **9**(1).
46. Tang, P., et al., *Correlation between Serum RANTES Levels and the Severity of Parkinson's Disease*. Oxidative Medicine And Cellular Longevity, 2014. **2014**: p. 1-4.
47. Wang, Y.R., et al., *Serum levels of inflammatory cytokines in Parkinson's disease and their clinical significance*. Chongqing Medicine, 2014. **43**(15): p. 1848-1850.
48. Yu, S.Y., et al., *Potential biomarkers relating pathological proteins, neuroinflammatory factors and free radicals in PD patients with cognitive impairment: a cross-sectional study*. BMC Neurol, 2014. **14**: p. 113.
49. Akil, E., et al., *The increase of carcinoembryonic antigen (CEA), high-sensitivity C-reactive protein, and neutrophil/lymphocyte ratio in Parkinson's disease*. Neurol Sci, 2015. **36**(3): p. 423-8.



50. Bu, X.L., et al., *The association between infectious burden and Parkinson's disease: A case-control study*. Parkinsonism Relat Disord, 2015. **21**(8): p. 877-81.
51. Hu, Y., et al., *Parkinson disease with REM sleep behavior disorder: features,  $\alpha$ -synuclein, and inflammation*. Neurology, 2015. **84**(9): p. 888-94.
52. Jiang, Q.W., J.F. Ma, and S.D. Chen, *Correlation between plasma macrophage inflammatory protein and early Parkinson's disease*. Chinese Journal of Neurology, 2015. **48**(6): p. 464-468.
53. Magdalinou, N.K., et al., *A panel of nine cerebrospinal fluid biomarkers may identify patients with atypical parkinsonian syndromes*. J Neurol Neurosurg Psychiatry, 2015. **86**(11): p. 1240-7.
54. Martín de Pablos, A., J.M. García-Moreno, and E. Fernández, *Does the Cerebrospinal Fluid Reflect Altered Redox State But Not Neurotrophic Support Loss in Parkinson's Disease?* Antioxid Redox Signal, 2015. **23**(11): p. 893-8.
55. Park, S.J. and Y.S. Yang, *Clinical Implication of High Sensitivity C-Reactive Protein for the Development of Dementia in Parkinson's Disease*. Dementia and Neurocognitive Disorders, 2015. **14**(3): p. 123-127.
56. Umemura, A., et al., *Baseline Plasma C-Reactive Protein Concentrations and Motor Prognosis in Parkinson Disease*. Plos One, 2015. **10**(8).
57. Wang, Y.H. and X.H. Shi, *A study on the association between the inflammatory factors and hallucination in patients with Parkinson disease*. Chinese Journal of Nervous and Mental Diseases, 2015. **41**(1): p. 1-4.
58. Wennstrom, M., et al., *The Inflammatory Marker YKL-40 Is Elevated in Cerebrospinal Fluid from Patients with Alzheimer's but Not Parkinson's Disease or Dementia with Lewy Bodies*. Plos One, 2015. **10**(8).
59. Csencsits-Smith, K., et al., *Serum Lymphocyte-Associated Cytokine Concentrations Change More Rapidly over Time in Multiple System Atrophy Compared to Parkinson Disease*. Neuroimmunomodulation, 2016. **23**(5-6): p. 301-308.
60. da Silva, D.J., et al., *Decreased Toll-Like Receptor 2 and Toll-Like Receptor 7/8-Induced Cytokines in Parkinson's Disease Patients*. Neuroimmunomodulation, 2016. **23**(1): p. 58-66.
61. de Farias, C.C., et al., *Highly specific changes in antioxidant levels and lipid peroxidation in Parkinson's disease and its progression: Disease and staging biomarkers and new drug targets*. Neurosci Lett, 2016. **617**: p. 66-71.
62. Gupta, V., R.K. Garg, and S. Khattri, *Levels of IL-8 and TNF- $\alpha$  decrease in Parkinson's disease*. Neurol Res, 2016. **38**(2): p. 98-102.
63. Hall, S., et al., *Longitudinal Measurements of Cerebrospinal Fluid Biomarkers in Parkinson's Disease*. Mov Disord, 2016. **31**(6): p. 898-905.
64. Li, Z.J., W. Zou, and Y. Yang, *Correlation of Serum Inflammatory Factors with Depression in Patients with Parkinson's Disease*. Acta Medicinæ Universitatis Scientiæ et Technologiæ Huazhong, 2016. **45**(6): p. 593-596.
65. Lue, L.F., et al., *Converging mediators from immune and trophic pathways to identify Parkinson disease dementia*. Neurol Neuroimmunol Neuroinflamm, 2016. **3**(1):

p. e193.

66. Pereira, J.R., et al., *IL-6 serum levels are elevated in Parkinson's disease patients with fatigue compared to patients without fatigue*. J Neurol Sci, 2016. **370**: p. 153-156.
67. Wang, X.M., et al., *Relationship between levels of inflammatory cytokines in the peripheral blood and the severity of depression and anxiety in patients with Parkinson's disease*. European Review For Medical And Pharmacological Sciences, 2016. **20**(18): p. 3853-3856.
68. Williams-Gray, C.H., et al., *Serum immune markers and disease progression in an incident Parkinson's disease cohort (ICICLE-PD)*. Mov Disord, 2016. **31**(7): p. 995-1003.
69. Delgado-Alvarado, M., et al., *Tau/alpha-Synuclein Ratio and Inflammatory Proteins in Parkinson's Disease: An Exploratory Study*. Movement Disorders, 2017. **32**(7): p. 1066-1073.
70. Eidson, L.N., et al., *Candidate inflammatory biomarkers display unique relationships with alpha-synuclein and correlate with measures of disease severity in subjects with Parkinson's disease*. Journal Of Neuroinflammation, 2017. **14**.
71. Bagheri, V., et al., *CXCL12 and CXCR4 in the Peripheral Blood of Patients with Parkinson's Disease*. Neuroimmunomodulation, 2018. **25**(4): p. 201-205.
72. Dos Santos, M.C.T., et al., *Evaluation of cerebrospinal fluid proteins as potential biomarkers for early stage Parkinson's disease diagnosis*. PLoS ONE, 2018. **13**(11).
73. Hall, S., et al., *Cerebrospinal fluid concentrations of inflammatory markers in Parkinson's disease and atypical parkinsonian disorders*. Sci Rep, 2018. **8**(1): p. 13276.
74. Ilyechova, E.Y., et al., *A low blood copper concentration is a co-morbidity burden factor in Parkinson's disease development*. Neurosci Res, 2018. **135**: p. 54-62.
75. Karpenko, M.N., et al., *Interleukin-1 beta, interleukin-1 receptor antagonist, interleukin-6, interleukin-10, and tumor necrosis factor-alpha levels in CSF and serum in relation to the clinical diversity of Parkinson's disease*. Cellular Immunology, 2018. **327**: p. 77-82.
76. Kim, R., et al., *Peripheral blood inflammatory markers in early Parkinson's disease*. J Clin Neurosci, 2018. **58**: p. 30-33.
77. Kouchaki, E., et al., *Correlation of serum levels and gene expression of tumor necrosis factor- $\alpha$ -induced protein-8 like-2 with Parkinson disease severity*. Metab Brain Dis, 2018. **33**(6): p. 1955-1959.
78. Kouchaki, E., et al., *Increased serum levels of TNF- $\alpha$  and decreased serum levels of IL-27 in patients with Parkinson disease and their correlation with disease severity*. Clin Neurol Neurosurg, 2018. **166**: p. 76-79.
79. Li, D., et al., *Association of Parkinson's disease-related pain with plasma interleukin-1, interleukin-6, interleukin-10, and tumour necrosis factor-alpha*. Neuroscience Letters, 2018. **683**: p. 181-184.
80. Moghaddam, H.S., et al., *Cerebrospinal Fluid C-Reactive Protein in Parkinson's Disease: Associations with Motor and Non-motor Symptoms*. Neuromolecular Medicine, 2018. **20**(3): p. 376-385.

81. Pochmann, D., et al., *Cytokine modulation in response to acute and chronic aquatic therapy intervention in Parkinson disease individuals: A pilot study*. Neurosci Lett, 2018. **674**: p. 30-35.
82. Rocha, N.P., et al., *Reduced Activated T Lymphocytes (CD4+CD25+) and Plasma Levels of Cytokines in Parkinson's Disease*. Mol Neurobiol, 2018. **55**(2): p. 1488-1497.
83. Rocha Sobrinho, H.M.D., et al., *TLR4 and TLR2 activation is differentially associated with age during Parkinson's disease*. Immunol Invest, 2018. **47**(1): p. 71-88.
84. Solmaz, V., et al., *Serum neutrophil-lymphocyte ratios, C-reactive protein and sedimentation levels in Parkinson's disease*. Cukurova Medical Journal, 2018. **43**(2): p. 305-311.
85. Starhof, C., et al., *Cerebrospinal fluid pro-inflammatory cytokines differentiate parkinsonian syndromes*. Journal Of Neuroinflammation, 2018. **15**.
86. Veselý, B., et al., *Interleukin 6 and complement serum level study in Parkinson's disease*. J Neural Transm (Vienna), 2018. **125**(5): p. 875-881.
87. Yang, Y., et al., *Helper T cell Th9 and its cytokine interleukin-9 in peripheral blood of patients with Parkinson's disease*. Chinese Journal of Neurology, 2018. **51**(3): p. 171-174.
88. Ahmadi Rastegar, D., et al., *Parkinson's progression prediction using machine learning and serum cytokines*. NPJ Parkinsons Dis, 2019. **5**: p. 14.
89. Alrafiah, A., et al., *Assessment of the Levels of Level of Biomarkers of Bone Matrix Glycoproteins and Inflammatory Cytokines from Saudi Parkinson Patients*. BioMed Research International, 2019. **2019**.
90. Álvarez-Luquín, D.D., et al., *Regulatory impairment in untreated Parkinson's disease is not restricted to Tregs: other regulatory populations are also involved*. J Neuroinflammation, 2019. **16**(1): p. 212.
91. Baran, A., et al., *High-sensitivity C-reactive protein and high mobility group box-1 levels in Parkinson's disease*. Neurological Sciences, 2019. **40**(1): p. 167-173.
92. Compta, Y., et al., *Cerebrospinal fluid cytokines in multiple system atrophy: A cross-sectional Catalan MSA registry study*. Parkinsonism Relat Disord, 2019. **65**: p. 3-12.
93. Green, H.F., S. Khosousi, and P. Svenningsson, *Plasma IL-6 and IL-17A Correlate with Severity of Motor and Non-Motor Symptoms in Parkinson's Disease*. Journal Of Parkinsons Disease, 2019. **9**(4): p. 705-709.
94. King, E., et al., *Inflammation in mild cognitive impairment due to Parkinson's disease, Lewy body disease, and Alzheimer's disease*. Int J Geriatr Psychiatry, 2019. **34**(8): p. 1244-1250.
95. Lian, T.H., et al., *Tremor-Dominant in Parkinson Disease: The Relevance to Iron Metabolism and Inflammation*. Front Neurosci, 2019. **13**: p. 255.
96. Lin, C.H., et al., *Altered gut microbiota and inflammatory cytokine responses in patients with Parkinson's disease*. J Neuroinflammation, 2019. **16**(1): p. 129.
97. Mollenhauer, B., et al., *Baseline predictors for progression 4 years after Parkinson's disease diagnosis in the De Novo Parkinson Cohort (DeNoPa)*. Mov Disord, 2019. **34**(12): p. 2247-2255.

2019. **34**(1): p. 67-77.
98. Perner, C., et al., *Plasma VCAM1 levels correlate with disease severity in Parkinson's disease*. Journal Of Neuroinflammation, 2019. **16**.
99. Santos-Garcia, D., et al., *High ultrasensitive serum C-reactive protein may be related to freezing of gait in Parkinson's disease patients*. Journal Of Neural Transmission, 2019. **126**(12): p. 1599-1608.
100. Yazar, T. and H.O. Yazar, *Evaluation of C-reactive Protein/Albumin Ratio According to Stage in Patients with Idiopathic Parkinson Disease*. Turkish Journal Of Neurology, 2019. **25**(3): p. 123-128.
101. Calvani, R., et al., *A novel multi-marker discovery approach identifies new serum biomarkers for Parkinson's disease in older people: an EXosomes in PARKINSON Disease (EXPAND) ancillary study*. Geroscience, 2020. **42**(5): p. 1323-1334.
102. Chatterjee, K., et al., *Inflammasome and  $\alpha$ -synuclein in Parkinson's disease: A cross-sectional study*. J Neuroimmunol, 2020. **338**: p. 577089.
103. Fan, Z., et al., *Systemic activation of NLRP3 inflammasome and plasma  $\alpha$ -synuclein levels are correlated with motor severity and progression in Parkinson's disease*. J Neuroinflammation, 2020. **17**(1): p. 11.
104. Iwaoka, K., et al., *Impaired metabolism of kynurenine and its metabolites in CSF of parkinson's disease*. Neuroscience Letters, 2020. **714**.
105. Jin, H., et al., *Association of inflammatory factors and aging in Parkinson's disease*. Neurosci Lett, 2020. **736**: p. 135259.
106. K $\i$ çik, A., et al., *Neuroinflammation mediators are reduced in sera of Parkinson's disease patients with mild cognitive impairment*. Noropsikiyatri Arsivi, 2020. **57**(1): p. 15-17.
107. Kwiatek-Majkusiak, J., et al., *Serum levels of hepcidin and interleukin 6 in Parkinson's disease*. Acta Neurobiologiae Experimentalis, 2020. **80**(3): p. 297-304.
108. Majbour, N.K., et al., *CSF total and oligomeric alpha-Synuclein along with TNF-alpha as risk biomarkers for Parkinson's disease: a study in LRRK2 mutation carriers*. Translational Neurodegeneration, 2020. **9**(1).
109. Martin-Ruiz, C., et al., *Senescence and Inflammatory Markers for Predicting Clinical Progression in Parkinson's Disease: The ICICLE-PD Study*. Journal Of Parkinsons Disease, 2020. **10**(1): p. 193-206.
110. Miliukhina, I.V., et al., *Plasma Cytokines Profile in Patients with Parkinson's Disease Associated with Mutations in GBA Gene*. Bulletin Of Experimental Biology And Medicine, 2020. **168**(4): p. 423-426.
111. Moghadam-Ahmadi, A., et al., *Eotaxins and C-C chemokine receptor type 3 in Parkinson's disease*. Acta Neurologica Belgica, 2020. **120**(3): p. 589-594.
112. Lian, T.H., et al., *Parkinson's Disease With Depression: The Correlations Between Neuroinflammatory Factors and Neurotransmitters in Cerebrospinal Fluid*. Front Aging Neurosci, 2020. **12**: p. 574776.
113. Peng, G., et al., *Analysis of Cerebrospinal Fluid Soluble TREM2 and Polymorphisms in Sporadic Parkinson's Disease in a Chinese Population*. J Mol Neurosci, 2020.

- 70**(2): p. 294-301.
114. Sankowski, B., et al., *Higher cerebrospinal fluid to plasma ratio of p-cresol sulfate and indoxyl sulfate in patients with Parkinson's disease*. Clin Chim Acta, 2020. **501**: p. 165-173.
  115. Santaella, A., et al., *Inflammation biomarker discovery in Parkinson's disease and atypical parkinsonisms*. BMC Neurology, 2020. **20**(1).
  116. Santaella, A., et al., *Cerebrospinal fluid monocyte chemoattractant protein 1 correlates with progression of Parkinson's disease*. NPJ Parkinson's disease, 2020. **6**: p. 21-21.
  117. Szymura, J., et al., *The Immunomodulatory Effects of Systematic Exercise in Older Adults and People with Parkinson's Disease*. Journal Of Clinical Medicine, 2020. **9**(1).
  118. Usenko, T.S., et al., *Plasma cytokine profile in synucleinopathies with dementia*. Journal Of Clinical Neuroscience, 2020. **78**: p. 323-326.
  119. Yang, W.L., et al., *Contra-Directional Expression of Plasma Superoxide Dismutase with Lipoprotein Cholesterol and High-Sensitivity C-reactive Protein as Important Markers of Parkinson's Disease Severity*. Frontiers In Aging Neuroscience, 2020. **12**.
  120. Yu, C.C., et al., *Vascular Inflammation Is a Risk Factor Associated with Brain Atrophy and Disease Severity in Parkinson's Disease: A Case-Control Study*. Oxid Med Cell Longev, 2020. **2020**: p. 2591248.
  121. Bartl, M., et al., *Biomarkers of neurodegeneration and glial activation validated in Alzheimer's disease assessed in longitudinal cerebrospinal fluid samples of Parkinson's disease*. PLoS One, 2021. **16**(10): p. e0257372.
  122. Chen, S.J., et al., *Plasma Lipopolysaccharide-Binding Protein Reflects Risk and Progression of Parkinson's Disease*. J Parkinsons Dis, 2021. **11**(3): p. 1129-1139.
  123. Galper, J., et al., *Cytokines and Gaucher Biomarkers in Glucocerebrosidase Carriers With and Without Parkinson Disease*. Movement Disorders, 2021. **36**(6): p. 1451-1455.
  124. Hatcher-Martin, J.M., et al., *Cerebrospinal fluid biomarkers in Parkinson's disease with freezing of gait: an exploratory analysis*. Npj Parkinsons Disease, 2021. **7**(1).
  125. Hu, Y., et al., *Clinical Characteristics, Iron Metabolism and Neuroinflammation: New Insight into Excessive Daytime Sleepiness in Parkinson's Disease*. Neuropsychiatr Dis Treat, 2021. **17**: p. 2041-2051.
  126. Li, S.Y., et al., *Serum Folate, Vitamin B12 Levels, and Systemic Immune-Inflammation Index Correlate With Motor Performance in Parkinson's Disease: A Cross-Sectional Study*. Frontiers In Neurology, 2021. **12**.
  127. Lin, Y.W., et al., *Bone-Derived Factors as Potential Biomarkers for Parkinson's Disease*. Frontiers In Aging Neuroscience, 2021. **13**.
  128. Mo, M.S., et al., *Soluble Triggering Receptor Expressed on Myeloid Cells 2 From Cerebrospinal Fluid in Sleep Disorders Related to Parkinson's Disease*. Frontiers In Aging Neuroscience, 2021. **13**.

129. Muruzheva, Z.M., et al., *Calpain activity in plasma of patients with essential tremor and Parkinson's disease: a pilot study*. Neurological Research, 2021. **43**(4): p. 314-320.
130. Roy, A., et al., *Soluble LAG-3 and Toll-interacting protein: Novel upstream neuro-inflammatory markers in Parkinson's disease*. Parkinsonism & Related Disorders, 2021. **91**: p. 121-123.
131. Solini, A., et al., *P2X7 receptor/NLRP3 inflammasome complex and alpha-synuclein in peripheral blood mononuclear cells: a prospective study in neo-diagnosed, treatment-naive Parkinson's disease*. European Journal Of Neurology, 2021. **28**(8): p. 2648-2656.
132. Thaler, A., et al., *Biochemical markers for severity and risk in GBA and LRRK2 Parkinson's disease*. Journal Of Neurology, 2021. **268**(4): p. 1517-1525.
133. Wu, H.C., et al., *Alterations of plasma galectin-3 and c3 levels in patients with parkinson's disease*. Brain Sciences, 2021. **11**(11).
134. Wu, Z.B., et al., *Lipoprotein-Associated Phospholipase A2 Is a Risk Factor for Patients With Parkinson's Disease*. Frontiers In Neuroscience, 2021. **15**.
135. Xia, D.H., et al., *The evaluation of cerebrospinal fluid cytokines in the differential diagnosis of Parkinson disease and atypical parkinsonism*. Chinese Journal of Nervous and Mental Diseases, 2021. **47**(6): p. 355-360.
136. Yin, Y.H., X. Jin, and G.H. Wang, *Level and significance of follicular helper T cells (Tfh) and activated B cells in peripheral blood of patients with Parkinson ' s disease*. Chinese Journal of Immunology, 2021. **37**(6): p. 725-728.
137. Zhu, Y., et al., *Levels of serum IL6, TNF- $\alpha$  and sLAG3 are changed and correlated with clinical characteristics in Parkinson's disease patients: A case-control study*. Neurology Asia, 2021. **26**(4): p. 709-714.
138. Al-Huchaimi, S.H.K., G.H.N. Al-Kefaei, and B.A. Alameedy, *Effects of Toxoplasma gondii on Levels of Interleukin-5 in Parkinson's Patients*. Archives of Razi Institute, 2022. **77**(1): p. 195-202.
139. Diaz, K., et al., *Peripheral inflammatory cytokines and motor symptoms in persons with Parkinson's disease*. Brain, behavior, & immunity - health, 2022. **21**: p. 100442-100442.
140. El-Kattan, M.M., et al., *Relation of serum level of tumor necrosis factor-alpha to cognitive functions in patients with Parkinson's disease*. Egyptian Journal Of Neurology Psychiatry And Neurosurgery, 2022. **58**(1).
141. Ghit, A. and H.E. Deeb, *Cytokines, miRNAs, and Antioxidants as Combined Non-invasive Biomarkers for Parkinson's Disease*. J Mol Neurosci, 2022. **72**(5): p. 1133-1140.
142. Gupta, M., V.K. Paliwal, and G.N. Babu, *Serum fractalkine and 3-nitrotyrosine levels correlate with disease severity in Parkinson's disease: a pilot study*. Metabolic Brain Disease, 2022. **37**(1): p. 209-217.
143. Haji, S., et al., *Serum NfL and CHI3L1 for ALS and parkinsonian disorders in the process of diagnosis*. J Neural Transm (Vienna), 2022. **129**(3): p. 301-309.

144. Imarisio, A., et al., *Plasma Cystatin C correlates with plasma NfL levels and predicts disease progression in Parkinson's disease*. Neuro-degenerative diseases, 2022.
145. Li, Y.Y., et al., *Parkinson's disease peripheral immune biomarker profile: a multicentre, cross-sectional and longitudinal study*. Journal Of Neuroinflammation, 2022. **19**(1).
146. Kaminska, M., et al., *Inflammatory markers and BDNF in obstructive sleep apnea (OSA) in Parkinson's disease (PD)*. Sleep medicine, 2022. **90**: p. 258-261.
147. Liu, J., et al., *Association between levels of high-sensitivity C-reactive protein in plasma and freezing of gait in Parkinson's disease*. Aging Clinical And Experimental Research, 2022.
148. Lerche, S., et al., *CSF and Serum Levels of Inflammatory Markers in PD: Sparse Correlation, Sex Differences and Association With Neurodegenerative Biomarkers*. Frontiers In Neurology, 2022. **13**.
149. Wang, L.X., et al., *Peripheral blood inflammatory cytokines are associated with rapid eye movement sleep behavior disorder in Parkinson's disease*. Neurosci Lett, 2022. **782**: p. 136692.
150. Xu, J.H., et al., *Characteristics of systemic inflammation and brain iron deposition in Parkinson's disease patients*. Annals Of Clinical And Translational Neurology, 2022. **9**(3): p. 276-285.
151. Yuan, Y., et al., *Cerebrospinal Fluid TNF- $\alpha$  and Orexin in Patients With Parkinson's Disease and Rapid Eye Movement Sleep Behavior Disorder*. Front Neurol, 2022. **13**: p. 826013.
152. Zhao, Y., et al., *Plasma proteome profiling using tandem mass tag labeling technology reveals potential biomarkers for Parkinson's disease: a preliminary study*. Proteomics Clin Appl, 2022. **16**(2): p. e2100010.

**Supplementary Table 4. Quality assessment.**

| No. | Author           | Year | <i>SELECTION</i> |   |   |   | <i>COMPARABILITY</i> | <i>EXPOSURE</i> |   |   | Total |
|-----|------------------|------|------------------|---|---|---|----------------------|-----------------|---|---|-------|
|     |                  |      | 1                | 2 | 3 | 4 | 1                    | 1               | 2 | 3 |       |
| 1   | Mogi, M.         | 1994 |                  | ★ |   | ★ | ★                    | ★               | ★ | ★ | 6     |
| 2   | BlumDegen, D.    | 1995 | ★                | ★ |   | ★ | ★                    | ★               | ★ | ★ | 7     |
| 3   | Klueter, H.      | 1995 | ★                | ★ | ★ | ★ | ★                    | ★               | ★ | ★ | 8     |
| 4   | Mogi, M.         | 1996 |                  | ★ |   | ★ | ★                    | ★               | ★ | ★ | 6     |
| 5   | Stypula, G.      | 1996 |                  | ★ |   | ★ | ★★                   | ★               | ★ | ★ | 7     |
| 6   | Vawter, M. P.    | 1996 |                  | ★ |   | ★ | ★                    | ★               | ★ | ★ | 6     |
| 7   | Mueller, T.      | 1998 |                  | ★ |   | ★ | ★                    | ★               | ★ | ★ | 6     |
| 8   | Dobbs, R. J.     | 1999 | ★                | ★ | ★ | ★ | ★★                   | ★               | ★ | ★ | 9     |
| 9   | Wandinger, K. P. | 1999 | ★                | ★ |   | ★ | ★★                   | ★               | ★ | ★ | 8     |
| 10  | Yang, Z. Z.      | 2001 | ★                | ★ | ★ | ★ | ★                    | ★               | ★ | ★ | 8     |
| 11  | Selikhova, M. V. | 2002 | ★                | ★ | ★ | ★ | ★                    | ★               | ★ | ★ | 8     |
| 12  | Rota, E.         | 2006 | ★                | ★ |   | ★ | ★★                   | ★               | ★ | ★ | 8     |
| 13  | Rentzos, M.      | 2007 | ★                | ★ | ★ | ★ | ★★                   | ★               | ★ | ★ | 9     |
| 14  | Brodacki, B.     | 2008 | ★                | ★ | ★ | ★ | ★                    | ★               | ★ | ★ | 8     |
| 15  | Chen, H. L.      | 2008 |                  | ★ | ★ | ★ | ★                    | ★               | ★ | ★ | 7     |
| 16  | Choi, C.         | 2008 | ★                | ★ | ★ | ★ | ★★                   | ★               | ★ | ★ | 9     |
| 17  | Xu, J. P.        | 2008 | ★                | ★ | ★ | ★ | ★                    | ★               | ★ | ★ | 8     |
| 18  | Dufek, M.        | 2009 | ★                | ★ |   | ★ | ★★                   | ★               | ★ |   | 7     |
| 19  | Hofmann, K. W.   | 2009 | ★                | ★ | ★ | ★ | ★★                   | ★               | ★ | ★ | 9     |
| 20  | Rentzos, M.      | 2009 | ★                | ★ | ★ | ★ | ★★                   | ★               | ★ | ★ | 9     |
| 21  | Scalzo, P.       | 2009 |                  | ★ |   | ★ | ★★                   | ★               | ★ | ★ | 7     |
| 22  | Tuncel, D.       | 2009 | ★                | ★ | ★ | ★ | ★★                   | ★               | ★ | ★ | 9     |
| 23  | Menza, M.        | 2010 | ★                | ★ |   |   | ★★                   | ★               | ★ | ★ | 7     |
| 24  | Pålhagen, S.     | 2010 | ★                | ★ |   |   | ★★                   | ★               | ★ | ★ | 7     |
| 25  | Scalzo, P.       | 2010 |                  | ★ | ★ | ★ | ★★                   | ★               | ★ | ★ | 8     |
| 26  | Varani, K.       | 2010 | ★                | ★ | ★ | ★ | ★                    | ★               | ★ | ★ | 8     |
| 27  | Hassin-Baer, S.  | 2011 | ★                | ★ |   |   | ★★                   | ★               | ★ | ★ | 7     |
| 28  | Lee, H. W.       | 2011 | ★                | ★ |   | ★ | ★★                   | ★               | ★ | ★ | 8     |
| 29  | Scalzo, P.       | 2011 |                  | ★ |   | ★ | ★★                   | ★               | ★ | ★ | 7     |
| 30  | Shi, M.          | 2011 | ★                | ★ | ★ | ★ | ★                    | ★               | ★ | ★ | 8     |
| 31  | Andican, G.      | 2012 |                  | ★ |   | ★ | ★★                   | ★               | ★ | ★ | 7     |
| 32  | Gruden, M. A.    | 2012 |                  | ★ |   | ★ | ★                    | ★               | ★ | ★ | 6     |
| 33  | Koziorowski, D.  | 2012 | ★                | ★ | ★ | ★ | ★                    | ★               | ★ | ★ | 8     |
| 34  | Lindqvist, D.    | 2012 |                  | ★ | ★ | ★ | ★★                   | ★               | ★ | ★ | 8     |
| 35  | Liu, J.          | 2012 | ★                | ★ | ★ | ★ | ★                    | ★               | ★ | ★ | 8     |
| 36  | Mahlknecht, P.   | 2012 | ★                | ★ | ★ | ★ | ★                    | ★               | ★ | ★ | 8     |
| 37  | Sathe, K.        | 2012 | ★                | ★ |   | ★ | ★                    | ★               | ★ | ★ | 7     |
| 38  | Ton, T. G.       | 2012 |                  | ★ | ★ | ★ |                      | ★               | ★ | ★ | 6     |
| 39  | Zhao, X. Q.      | 2012 | ★                | ★ | ★ | ★ | ★★                   | ★               | ★ | ★ | 9     |
| 40  | Lindqvist, D.    | 2013 |                  | ★ | ★ | ★ | ★★                   | ★               | ★ | ★ | 8     |
| 41  | Olsson, B.       | 2013 | ★                | ★ |   | ★ | ★                    | ★               | ★ | ★ | 7     |



|    |                          |      |   |   |   |   |    |   |   |   |   |
|----|--------------------------|------|---|---|---|---|----|---|---|---|---|
| 42 | Rocha, N. P.             | 2014 | ★ | ★ | ★ | ★ | ★★ | ★ | ★ | ★ | 9 |
| 43 | Rocha, N. P.             | 2014 | ★ | ★ | ★ | ★ | ★★ | ★ | ★ | ★ | 9 |
| 44 | Sawada, H.               | 2014 | ★ | ★ | ★ | ★ | ★★ | ★ | ★ | ★ | 9 |
| 45 | Song, I. U.              | 2014 | ★ | ★ |   | ★ | ★  | ★ | ★ | ★ | 7 |
| 46 | Tang, P.                 | 2014 | ★ | ★ | ★ | ★ | ★  | ★ | ★ | ★ | 8 |
| 47 | Wang, Y. R.              | 2014 | ★ | ★ |   | ★ | ★★ | ★ | ★ | ★ | 8 |
| 48 | Yu, S. Y.                | 2014 | ★ | ★ | ★ | ★ | ★  | ★ | ★ | ★ | 8 |
| 49 | Akil, E.                 | 2015 | ★ | ★ | ★ | ★ | ★  | ★ | ★ | ★ | 8 |
| 50 | Bu, X. L.                | 2015 | ★ | ★ |   | ★ | ★  | ★ | ★ | ★ | 7 |
| 51 | Hu, Y.                   | 2015 | ★ | ★ |   | ★ | ★  | ★ | ★ | ★ | 7 |
| 52 | Jiang, Q. W.             | 2015 | ★ | ★ | ★ | ★ | ★  | ★ | ★ | ★ | 8 |
| 53 | Magdalinou, N. K.        | 2015 |   | ★ | ★ | ★ | ★  | ★ | ★ | ★ | 7 |
| 54 | Martín de Pablos, A.     | 2015 | ★ | ★ | ★ | ★ | ★  | ★ | ★ | ★ | 8 |
| 55 | Park, S. J.              | 2015 | ★ | ★ | ★ | ★ | ★★ | ★ | ★ | ★ | 9 |
| 56 | Umemura, A.              | 2015 | ★ | ★ |   | ★ | ★★ | ★ | ★ | ★ | 8 |
| 57 | Wang, Y. H.              | 2015 | ★ | ★ |   | ★ | ★  | ★ | ★ | ★ | 7 |
| 58 | Wennstrom, M.            | 2015 | ★ | ★ | ★ | ★ | ★  | ★ | ★ | ★ | 8 |
| 59 | Csencsits-Smith, K.      | 2016 | ★ | ★ |   | ★ | ★  | ★ | ★ | ★ | 7 |
| 60 | da Silva, D. J.          | 2016 | ★ | ★ |   | ★ | ★  | ★ | ★ | ★ | 7 |
| 61 | de Farias, C. C.         | 2016 | ★ | ★ | ★ | ★ | ★  | ★ | ★ | ★ | 8 |
| 62 | Gupta, V.                | 2016 | ★ | ★ |   | ★ | ★  | ★ | ★ | ★ | 7 |
| 63 | Hall, S.                 | 2016 |   | ★ | ★ | ★ | ★  | ★ | ★ | ★ | 7 |
| 64 | Li, Z. J.                | 2016 | ★ | ★ | ★ | ★ | ★  | ★ | ★ | ★ | 8 |
| 65 | Lue, L. F.               | 2016 | ★ | ★ | ★ | ★ | ★★ | ★ | ★ | ★ | 9 |
| 66 | Pereira, J. R.           | 2016 | ★ | ★ | ★ | ★ | ★★ | ★ | ★ | ★ | 9 |
| 67 | Wang, X. M.              | 2016 | ★ | ★ | ★ | ★ | ★  | ★ | ★ | ★ | 8 |
| 68 | Williams-Gray, C. H.     | 2016 | ★ | ★ | ★ | ★ | ★  | ★ | ★ | ★ | 8 |
| 69 | Delgado-Alvarado, M.     | 2017 | ★ | ★ | ★ | ★ |    | ★ | ★ | ★ | 7 |
| 70 | Eidson, L. N.            | 2017 | ★ | ★ |   | ★ | ★  | ★ | ★ | ★ | 7 |
| 71 | Bagheri, V.              | 2018 | ★ | ★ | ★ | ★ | ★★ | ★ | ★ | ★ | 9 |
| 72 | Dos Santos, M. C. T.     | 2018 | ★ | ★ |   | ★ | ★  | ★ | ★ | ★ | 7 |
| 73 | Hall, S.                 | 2018 | ★ | ★ | ★ | ★ | ★★ | ★ | ★ | ★ | 9 |
| 74 | Karpenko, M. N.          | 2018 |   | ★ | ★ | ★ | ★★ | ★ | ★ | ★ | 8 |
| 75 | Kim, R.                  | 2018 | ★ | ★ | ★ | ★ | ★★ | ★ | ★ | ★ | 9 |
| 76 | Kouchaki, E.             | 2018 | ★ | ★ | ★ | ★ | ★  | ★ | ★ | ★ | 8 |
| 77 | Kouchaki, E.             | 2018 | ★ | ★ | ★ | ★ | ★  | ★ | ★ | ★ | 8 |
| 78 | Ilyechova, E. Y.         | 2018 | ★ | ★ | ★ | ★ | ★  | ★ | ★ | ★ | 8 |
| 79 | Li, D. H.                | 2018 | ★ | ★ | ★ | ★ | ★★ | ★ | ★ | ★ | 9 |
| 80 | Moghaddam, H. S.         | 2018 |   | ★ | ★ | ★ | ★  | ★ | ★ | ★ | 7 |
| 81 | Pochmann, D.             | 2018 |   | ★ |   | ★ | ★  | ★ | ★ | ★ | 6 |
| 82 | Rocha, N. P.             | 2018 | ★ | ★ | ★ | ★ | ★★ | ★ | ★ | ★ | 9 |
| 83 | Rocha Sobrinho, H. M. D. | 2018 | ★ | ★ | ★ | ★ | ★★ | ★ | ★ | ★ | 9 |
| 84 | Solmaz, V.               | 2018 | ★ | ★ |   | ★ | ★  | ★ | ★ | ★ | 7 |
| 85 | Starhof, C.              | 2018 |   | ★ |   | ★ | ★  | ★ | ★ | ★ | 6 |

|     |                       |      |   |   |   |    |   |   |   |   |
|-----|-----------------------|------|---|---|---|----|---|---|---|---|
| 86  | Veselý, B.            | 2018 | ★ | ★ |   | ★  | ★ | ★ | ★ | 6 |
| 87  | Yang, Y.              | 2018 | ★ | ★ | ★ | ★  | ★ | ★ | ★ | 9 |
| 88  | Ahmadi Rastegar, D.   | 2019 | ★ | ★ |   | ★★ | ★ | ★ | ★ | 7 |
| 89  | Alrafiah, A.          | 2019 |   | ★ | ★ | ★  | ★ | ★ | ★ | 7 |
| 90  | Álvarez-Luquín, D. D. | 2019 | ★ | ★ |   | ★  | ★ | ★ | ★ | 7 |
| 91  | Baran, A.             | 2019 | ★ | ★ | ★ | ★  | ★ | ★ | ★ | 9 |
| 92  | Compta, Y.            | 2019 |   | ★ | ★ | ★  | ★ | ★ | ★ | 7 |
| 93  | Green, H. F.          | 2019 |   | ★ |   | ★  | ★ | ★ | ★ | 6 |
| 94  | King, E.              | 2019 | ★ | ★ | ★ | ★  | ★ | ★ | ★ | 8 |
| 95  | Lian, T. H.           | 2019 | ★ | ★ |   | ★  | ★ | ★ | ★ | 8 |
| 96  | Lin, C. H.            | 2019 | ★ | ★ | ★ | ★  | ★ | ★ | ★ | 9 |
| 97  | Mollenhauer, B.       | 2019 | ★ | ★ |   | ★  | ★ | ★ | ★ | 7 |
| 98  | Perner, C.            | 2019 | ★ | ★ |   | ★  | ★ | ★ | ★ | 8 |
| 99  | Santos-Garcia, D.     | 2019 |   | ★ |   | ★  | ★ | ★ | ★ | 7 |
| 100 | Yazar, T.             | 2019 | ★ | ★ |   | ★  | ★ | ★ | ★ | 7 |
| 101 | Calvani, R.           | 2020 | ★ | ★ |   | ★  | ★ | ★ | ★ | 7 |
| 102 | Chatterjee, K.        | 2020 | ★ | ★ | ★ | ★  | ★ | ★ | ★ | 9 |
| 103 | Fan, Z.               | 2020 | ★ | ★ | ★ | ★  | ★ | ★ | ★ | 9 |
| 104 | Kiçik, A.             | 2020 | ★ | ★ | ★ | ★  | ★ | ★ | ★ | 9 |
| 105 | Iwaoka, K.            | 2020 | ★ | ★ |   | ★  | ★ | ★ | ★ | 8 |
| 106 | Jin, H.               | 2020 | ★ | ★ | ★ | ★  | ★ | ★ | ★ | 9 |
| 107 | Kwiatek-Majkusiak, J. | 2020 | ★ | ★ | ★ | ★  | ★ | ★ | ★ | 8 |
| 108 | Lian, T. H.           | 2020 | ★ | ★ | ★ | ★  | ★ | ★ | ★ | 9 |
| 109 | Majbour, N. K.        | 2020 | ★ | ★ | ★ | ★  | ★ | ★ | ★ | 8 |
| 110 | Martin-Ruiz, C.       | 2020 | ★ | ★ |   | ★  | ★ | ★ | ★ | 7 |
| 111 | Miliukhina, I. V.     | 2020 | ★ | ★ | ★ | ★  | ★ | ★ | ★ | 8 |
| 112 | Moghadam-Ahmadi, A.   | 2020 | ★ | ★ | ★ | ★  | ★ | ★ | ★ | 8 |
| 113 | Peng, G.              | 2020 | ★ | ★ |   | ★  | ★ | ★ | ★ | 7 |
| 114 | Sankowski, B.         | 2020 | ★ | ★ | ★ | ★  | ★ | ★ | ★ | 8 |
| 115 | Santaella, A.         | 2020 | ★ | ★ | ★ | ★  | ★ | ★ | ★ | 9 |
| 116 | Santaella, A.         | 2020 | ★ | ★ | ★ | ★  | ★ | ★ | ★ | 9 |
| 117 | Szymura, J.           | 2020 |   | ★ |   | ★  | ★ | ★ | ★ | 6 |
| 118 | Usenko, T. S.         | 2020 | ★ | ★ |   | ★  | ★ | ★ | ★ | 7 |
| 119 | Yang, W. L.           | 2020 | ★ | ★ |   | ★  | ★ | ★ | ★ | 7 |
| 120 | Yu, C. C.             | 2020 | ★ | ★ | ★ | ★  | ★ | ★ | ★ | 8 |
| 121 | Bartl, M.             | 2021 | ★ | ★ | ★ | ★  | ★ | ★ | ★ | 8 |
| 122 | Chen, S. J.           | 2021 | ★ | ★ |   | ★  | ★ | ★ | ★ | 7 |
| 123 | Galper, J.            | 2021 |   | ★ |   | ★  | ★ | ★ | ★ | 6 |
| 124 | Hatcher-Martin, J. M. | 2021 | ★ | ★ | ★ | ★  | ★ | ★ | ★ | 8 |
| 125 | Hu, Y.                | 2021 | ★ | ★ | ★ | ★  | ★ | ★ | ★ | 8 |
| 126 | Li, S. Y.             | 2021 | ★ | ★ |   | ★  | ★ | ★ | ★ | 6 |
| 127 | Lin, Y. W.            | 2021 | ★ | ★ | ★ | ★  | ★ | ★ | ★ | 8 |
| 128 | Mo, M. S.             | 2021 | ★ | ★ | ★ | ★  | ★ | ★ | ★ | 8 |
| 129 | Muruzheva, Z. M.      | 2021 | ★ | ★ | ★ | ★  | ★ | ★ | ★ | 8 |

|     |                       |      |   |   |   |    |    |   |   |   |
|-----|-----------------------|------|---|---|---|----|----|---|---|---|
| 130 | Roy, A.               | 2021 | ★ | ★ | ★ | ★  | ★  | ★ | ★ | 6 |
| 131 | Solini, A.            | 2021 | ★ | ★ | ★ | ★  | ★  | ★ | ★ | 8 |
| 132 | Thaler, A.            | 2021 | ★ | ★ | ★ | ★  | ★  | ★ | ★ | 8 |
| 133 | Wu, H. C.             | 2021 | ★ | ★ | ★ | ★★ | ★  | ★ | ★ | 8 |
| 134 | Wu, Z. B.             | 2021 | ★ | ★ | ★ | ★  | ★  | ★ | ★ | 7 |
| 135 | Xia, D. H.            | 2021 | ★ | ★ | ★ | ★  | ★  | ★ | ★ | 8 |
| 136 | Yin, Y. H.            | 2021 | ★ | ★ | ★ | ★  | ★★ | ★ | ★ | 9 |
| 137 | Zhu, Y.               | 2021 | ★ | ★ | ★ | ★  | ★  | ★ | ★ | 7 |
| 138 | Al-Huchaimi, S. H. K. | 2022 | ★ | ★ | ★ | ★  | ★  | ★ | ★ | 8 |
| 139 | Diaz, K.              | 2022 | ★ | ★ | ★ | ★  | ★  | ★ | ★ | 6 |
| 140 | El-Kattan, M. M.      | 2022 | ★ | ★ | ★ | ★  | ★  | ★ | ★ | 8 |
| 141 | Ghit, A.              | 2022 | ★ | ★ | ★ | ★  | ★  | ★ | ★ | 8 |
| 142 | Gupta, M.             | 2022 | ★ | ★ | ★ | ★  | ★  | ★ | ★ | 8 |
| 143 | Haji, S.              | 2022 | ★ | ★ | ★ | ★  | ★  | ★ | ★ | 8 |
| 144 | Imarisio, A.          | 2022 | ★ | ★ | ★ | ★★ | ★  | ★ | ★ | 7 |
| 145 | Kaminska, M.          | 2022 | ★ | ★ | ★ | ★  | ★★ | ★ | ★ | 9 |
| 146 | Lerche, S.            | 2022 | ★ | ★ | ★ | ★  | ★  | ★ | ★ | 6 |
| 147 | Li, Y. Y.             | 2022 | ★ | ★ | ★ | ★  | ★  | ★ | ★ | 8 |
| 148 | Liu, J.               | 2022 | ★ | ★ | ★ | ★  | ★★ | ★ | ★ | 9 |
| 149 | Wang, L. X.           | 2022 | ★ | ★ | ★ | ★  | ★★ | ★ | ★ | 8 |
| 150 | Xu, J. H.             | 2022 | ★ | ★ | ★ | ★  | ★  | ★ | ★ | 7 |
| 151 | Yuan, Y.              | 2022 | ★ | ★ | ★ | ★  | ★  | ★ | ★ | 8 |
| 152 | Zhao, Y.              | 2022 | ★ | ★ | ★ | ★  | ★  | ★ | ★ | 8 |

**Supplementary Table 5. Official cytokine names.**

| Cytokines                     | Official Names                                                                                        |
|-------------------------------|-------------------------------------------------------------------------------------------------------|
| BDNF                          | Brain-derived neurotrophic factor                                                                     |
| CCL2 (MCP-1)                  | Chemokine (C-C motif) ligand 2; Monocyte chemoattractant protein-1                                    |
| CCL3 (MIP-1 $\alpha$ )        | Chemokine (C-C motif) ligand 3; Monocyte chemoattractant protein-1 alpha                              |
| CCL4 (MIP-1 $\beta$ )         | Chemokine (C-C motif) ligand 4; Monocyte chemoattractant protein-1 beta                               |
| CCL5 (RANTES)                 | Chemokine (C-C motif) ligand 5; Regulated upon activation normal T cell expressed and secreted factor |
| CCL7 (MCP-3)                  | Chemokine (C-C motif) ligand 3; Monocyte chemoattractant protein-3                                    |
| CCL8 (MCP-2)                  | Chemokine (C-C motif) ligand 8; Monocyte chemoattractant protein-2                                    |
| CCL11 (eotaxin-1)             | Chemokine (C-C motif) ligand 11                                                                       |
| CCL13 (MCP-4)                 | Monocyte chemotactic protein 13; Monocyte chemoattractant protein-4                                   |
| CCL15 (MIP-5)                 | Chemokine (C-C motif) ligand 15; Macrophage inflammatory protein-5                                    |
| CCL18 (MIP-4)                 | Chemokine (C-C motif) ligand 18; Macrophage inflammatory protein-4                                    |
| CCL20 (MIP-3 $\alpha$ )       | Chemokine (C-C motif) ligand 20; Macrophage inflammatory protein-3 alpha                              |
| CCL23 (MIP-3)                 | Chemokine (C-C motif) ligand 23; Macrophage inflammatory protein-3                                    |
| CCL24 (Eotaxin-2)             | Chemokine (C-C motif) ligand 24                                                                       |
| CCL28 (MEC)                   | Chemokine (C-C motif) ligand 28; Mucosae-associated epithelial chemokine                              |
| CRP                           | C-reactive protein                                                                                    |
| CSF-1                         | Macrophage-colony stimulating factor-1                                                                |
| CX3CL1 (Fractalkine)          | CX3 chemokine ligand 1                                                                                |
| CXCL1 (GRO- $\alpha$ )        | Chemokine (C-X-C motif) ligand 1 protein; Growth regulated oncogene alpha                             |
| CXCL10 (IP-10)                | Chemokine (C-X-C motif) ligand 10 protein; Interferon- $\gamma$ -inducible protein 10                 |
| CXCL12 (SDF-1)                | Chemokine (C-X-C motif) ligand 12 protein; Stromal cell-derived factor-1                              |
| EGF                           | Epidermal growth factor                                                                               |
| FGF basic                     | Fibroblast growth factor-basic                                                                        |
| FGF-19                        | Fibroblast growth factor-19                                                                           |
| FGF-2                         | Fibroblast growth factor-2                                                                            |
| Flt-3L                        | Fms related tyrosine kinase 3 ligand                                                                  |
| G-CSF                         | Granulocyte colony-stimulating factor                                                                 |
| GFAP                          | Glial fibrillary acidic protein                                                                       |
| GM-CSF                        | Granulocyte macrophage-colony stimulating factor                                                      |
| GRO                           | Growth-regulated oncogene                                                                             |
| H <sub>2</sub> O <sub>2</sub> | Hydrogen peroxide                                                                                     |
| HMGB1                         | High mobility group box 1                                                                             |
| IFN- $\alpha$ 2               | Interferon-alpha 2                                                                                    |
| IFN- $\gamma$                 | Interferon-gamma                                                                                      |
| IGF-1                         | Insulin-like growth factor-1                                                                          |

---

|                |                                                               |
|----------------|---------------------------------------------------------------|
| IL-1           | Interleukin-1                                                 |
| IL-1 $\alpha$  | Interleukin-1 alpha                                           |
| IL-1 $\beta$   | Interleukin-1 beta                                            |
| IL-1RA         | Interleukin-1 receptor antagonist                             |
| IL-2           | Interleukin-2                                                 |
| IL-2R          | IL-2 receptor                                                 |
| IL-3           | Interleukin-3                                                 |
| IL-4           | Interleukin-4                                                 |
| IL-5           | Interleukin-5                                                 |
| IL-6           | Interleukin-6                                                 |
| IL-7           | Interleukin-7                                                 |
| IL-8           | Interleukin-8                                                 |
| IL-9           | Interleukin-9                                                 |
| IL-10          | Interleukin-10                                                |
| IL-12          | Interleukin-12                                                |
| IL-12 P40      | IL-12 P40 chain                                               |
| IL-12 P70      | IL-12 P70 chain                                               |
| IL-13          | Interleukin-13                                                |
| IL-16          | Interleukin-16                                                |
| IL-17A         | Interleukin-17                                                |
| IL-18          | Interleukin-18                                                |
| IL-21          | Interleukin-21                                                |
| IL-23          | Interleukin-23                                                |
| IL-27          | Interleukin-27                                                |
| IL-33          | Interleukin-33                                                |
| MDC            | Monocyte-derived dendritic cell                               |
| NGAL           | Neutrophil gelatinase-associated lipocalin                    |
| NLRP3          | NOD-like receptor thermal protein domain associated protein 3 |
| NO             | Nitric oxide                                                  |
| NT-pro BNP     | N-terminal pro-B-type natriuretic peptide                     |
| PD-L1          | Programmed death-ligand 1                                     |
| PDGF           | Platelet-derived growth factor                                |
| PDGFB          | Platelet-derived growth factor-B                              |
| PEG2           | Prostaglandin E2                                              |
| PTX3           | Pentraxin 3                                                   |
| S100 $\beta$   | Central nervous system specific protein beta                  |
| SAA            | Serum amyloid A protein                                       |
| sAPP- $\alpha$ | Amyloid precursor protein-alpha                               |
| sAPP- $\beta$  | Amyloid precursor protein-beta                                |
| sCD40L         | Soluble CD40 ligand                                           |
| SCF            | Stem cell factor                                              |
| sICAM-1        | Soluble intercellular adhesion molecule-1                     |
| sLAG3          | Soluble lymphocyte-activation gene 3                          |
| sTNFR1         | Soluble tumor necrosis factor receptor 1                      |

---

---

|                |                                                            |
|----------------|------------------------------------------------------------|
| sTNFR2         | Soluble tumor necrosis factor receptor 2                   |
| sTREM2         | Soluble triggering receptor expressed on myeloid cells 2   |
| sVCAM-1        | Soluble vascular cell adhesion molecule-1                  |
| TGF- $\alpha$  | Transforming growth factor-alpha                           |
| TGF- $\beta$   | Transforming growth factor-beta                            |
| TGF- $\beta$ 1 | Transforming growth factor-beta1                           |
| TGF- $\beta$ 2 | Transforming growth factor-beta2                           |
| TIPE2          | Tumor necrosis factor - $\alpha$ induced protein 8 like -2 |
| TNF- $\alpha$  | Tumor necrosis factor-alpha                                |
| TNF- $\beta$   | Tumor necrosis factor-beta                                 |
| VEGF-A         | Vascular endothelial growth factor A                       |
| YKL-40         | Chitinase protein 40; Chitinase-3-like protein1 (CHI3L1)   |
| $\beta$ -NGF   | $\beta$ -nerve growth factor                               |

---

**Supplementary Table 6. Summary of comparative outcomes of peripheral blood cytokines levels in individuals with PD versus controls.**

| Cytokines                | No. Of Studies | No. Of Cases |      | Main Effect |        |        |         |         | Heterogeneity |    |         | Publication Bias   |                 |         |
|--------------------------|----------------|--------------|------|-------------|--------|--------|---------|---------|---------------|----|---------|--------------------|-----------------|---------|
|                          |                | PD           | HC   | Hedges's g  | LCI    | UCI    | z Score | P Value | Q Statistic   | df | P Value | I <sup>2</sup> (%) | Egger Intercept | P Value |
| IL-6                     | 44             | 2931         | 7912 | 0.603       | 0.325  | 0.881  | 4.25    | 0.000   | 940.9         | 43 | 0.000   | 95.4               | 4.787           | 0.009   |
| TNF- $\alpha$            | 40             | 2838         | 2121 | 0.593       | 0.293  | 0.894  | 3.871   | 0.000   | 898.3         | 39 | 0.000   | 95.7               | 2.843           | 0.207   |
| CRP                      | 34             | 3593         | 8191 | 0.510       | 0.313  | 0.706  | 5.09    | 0.000   | 503.3         | 33 | 0.000   | 93.4               | 2.733           | 0.047   |
| IL-1 $\beta$             | 23             | 1325         | 874  | 1.300       | 0.709  | 1.892  | 4.31    | 0.000   | 743.6         | 22 | 0.000   | 97.0               | 8.291           | 0.008   |
| IL-10                    | 19             | 954          | 680  | 0.028       | -0.279 | 0.336  | 0.18    | 0.856   | 149.7         | 18 | 0.000   | 88.0               | 1.047           | 0.589   |
| IFN- $\gamma$            | 17             | 993          | 927  | -0.385      | -0.743 | -0.026 | -2.10   | 0.035   | 210.7         | 16 | 0.000   | 92.4               | -4.759          | 0.018   |
| IL-8                     | 11             | 569          | 485  | -0.025      | -0.683 | 0.632  | -0.08   | 0.940   | 239.5         | 10 | 0.000   | 95.8               | -1.758          | 0.702   |
| IL-2                     | 10             | 572          | 370  | 0.274       | -0.249 | 0.797  | 1.03    | 0.304   | 115.8         | 9  | 0.000   | 92.2               | 4.012           | 0.200   |
| IL-4                     | 7              | 316          | 214  | -0.710      | -1.336 | -0.084 | -2.22   | 0.026   | 66.7          | 6  | 0.000   | 91.0               | -0.613          | 0.897   |
| MIP-1 $\alpha$           | 7              | 444          | 371  | -0.356      | -0.900 | 0.188  | -1.28   | 0.199   | 81.7          | 6  | 0.000   | 92.7               | -3.767          | 0.251   |
| CCL2<br>(MCP-1)          | 6              | 216          | 191  | 0.911       | 0.246  | 1.576  | 2.69    | 0.007   | 36.2          | 5  | 0.000   | 86.2               | 1.520           | 0.667   |
| IL-12                    | 6              | 388          | 265  | 0.356       | -0.513 | 1.225  | 0.80    | 0.422   | 96.4          | 5  | 0.000   | 94.8               | 7.257           | 0.023   |
| CCL11<br>(Eotaxin)       | 6              | 224          | 183  | 0.167       | -0.445 | 0.779  | 0.54    | 0.592   | 63.2          | 5  | 0.000   | 92.1               | 5.908           | 0.159   |
| NO                       | 5              | 634          | 231  | -0.040      | -0.698 | 0.617  | -0.12   | 0.904   | 61.2          | 4  | 0.000   | 93.5               | 9.643           | 0.073   |
| IL-13                    | 5              | 390          | 336  | 0.545       | -0.732 | 1.821  | 0.84    | 0.403   | 196.2         | 4  | 0.000   | 98.0               | 4.457           | 0.590   |
| CXCL10<br>(IP-10)        | 5              | 329          | 236  | 0.439       | -0.132 | 1.009  | 1.51    | 0.132   | 45.2          | 4  | 0.000   | 91.2               | 6.131           | 0.002   |
| IL-17A                   | 5              | 561          | 367  | 0.368       | -0.262 | 0.999  | 1.14    | 0.252   | 66.5          | 4  | 0.000   | 94.0               | 1.956           | 0.685   |
| CCL4<br>(MIP-1 $\beta$ ) | 4              | 178          | 176  | 0.158       | -1.000 | 1.316  | 0.27    | 0.789   | 73.2          | 3  | 0.000   | 95.9               | 10.032          | 0.294   |
| CX3CL1                   | 4              | 209          | 199  | 0.361       | 0.166  | 0.556  | 3.63    | 0.000   | 1.0           | 3  | 0.813   | 0.0                | -1.418          | 0.212   |

(Fractalkine)

|                               |   |     |     |        |        |       |       |       |       |   |       |      |         |       |
|-------------------------------|---|-----|-----|--------|--------|-------|-------|-------|-------|---|-------|------|---------|-------|
| IL-1RA                        | 4 | 363 | 249 | -1.189 | -2.641 | 0.263 | -1.61 | 0.108 | 121.0 | 3 | 0.000 | 97.5 | -4.160  | 0.611 |
| IL-9                          | 4 | 326 | 225 | 0.647  | -0.836 | 2.131 | 0.86  | 0.392 | 112.7 | 3 | 0.000 | 97.3 | 7.513   | 0.293 |
| CCL5<br>(RANTES)              | 4 | 224 | 181 | 0.016  | -1.060 | 1.092 | 0.03  | 0.977 | 51.8  | 3 | 0.000 | 94.2 | -4.961  | 0.273 |
| IL-1                          | 4 | 259 | 164 | 1.230  | -0.424 | 2.884 | 1.46  | 0.145 | 127.3 | 3 | 0.000 | 97.6 | 8.565   | 0.456 |
| IL-2R                         | 4 | 265 | 189 | 0.283  | -0.302 | 0.867 | 0.95  | 0.343 | 25.7  | 3 | 0.000 | 88.3 | -4.836  | 0.568 |
| STNFR1                        | 4 | 210 | 243 | 0.449  | 0.004  | 0.894 | 1.98  | 0.048 | 12.8  | 3 | 0.005 | 76.6 | 5.833   | 0.016 |
| STNFR2                        | 4 | 210 | 243 | 0.157  | -0.120 | 0.434 | 1.11  | 0.266 | 5.3   | 3 | 0.151 | 43.4 | 3.661   | 0.063 |
| PEG2                          | 3 | 192 | 96  | 0.044  | -0.593 | 0.681 | 0.14  | 0.892 | 12.2  | 2 | 0.002 | 83.6 | 14.486  | 0.305 |
| H <sub>2</sub> O <sub>2</sub> | 3 | 404 | 96  | 0.062  | -0.340 | 0.465 | 0.30  | 0.761 | 6.5   | 2 | 0.038 | 69.3 | -91.998 | 0.367 |
| IL-12 P70                     | 3 | 44  | 46  | -0.080 | -0.494 | 0.335 | -0.38 | 0.707 | 1.8   | 2 | 0.409 | 0.0  | -1.584  | 0.846 |
| IL-12 P40                     | 3 | 42  | 43  | 0.222  | -0.461 | 0.905 | 0.64  | 0.524 | 4.8   | 2 | 0.090 | 58.5 | 0.775   | 0.947 |
| YKL-40                        | 3 | 115 | 114 | 1.523  | -0.708 | 3.754 | 1.34  | 0.181 | 98.6  | 2 | 0.000 | 98.0 | 20.200  | 0.064 |
| IL-7                          | 3 | 242 | 188 | -0.401 | -1.404 | 0.602 | -0.78 | 0.433 | 19.8  | 2 | 0.000 | 89.9 | 4.146   | 0.353 |
| CXCL12<br>(SDF-1)             | 3 | 186 | 192 | 2.933  | 0.883  | 4.983 | 2.80  | 0.005 | 120.5 | 2 | 0.000 | 98.3 | 13.726  | 0.199 |
| IGF-1                         | 3 | 186 | 192 | 0.534  | 0.355  | 0.714 | 5.83  | 0.000 | 2.2   | 2 | 0.329 | 10.0 | 13.726  | 0.199 |
| CCL24<br>(Eotaxin-2)          | 3 | 117 | 78  | 0.609  | -0.086 | 1.303 | 1.72  | 0.086 | 21.9  | 2 | 0.000 | 90.9 | 9.995   | 0.039 |
| sICAM-1                       | 3 | 175 | 121 | 0.194  | -0.488 | 0.877 | 0.56  | 0.576 | 14.8  | 2 | 0.001 | 86.5 | 5.890   | 0.466 |
| IL-1A                         | 2 | 32  | 28  | -0.096 | -0.603 | 0.411 | -0.37 | 0.710 | 0.16  | 1 | 0.685 | 0.0  | -       | -     |
| TGF- $\beta$                  | 2 | 131 | 112 | -0.497 | -1.917 | 0.922 | -0.69 | 0.492 | 26.3  | 1 | 0.000 | 96.2 | -       | -     |
| TGF- $\beta$ 1                | 2 | 43  | 57  | -0.202 | -1.184 | 0.780 | -0.40 | 0.687 | 5.6   | 1 | 0.018 | 82.3 | -       | -     |
| G-CSF                         | 2 | 99  | 92  | -0.830 | -2.226 | 0.566 | -1.17 | 0.244 | 14.7  | 1 | 0.000 | 93.2 | -       | -     |
| IL-5                          | 2 | 67  | 73  | 0.023  | -0.788 | 0.834 | 0.06  | 0.956 | 2.3   | 1 | 0.126 | 57.3 | -       | -     |



|                  |   |     |     |        |        |        |       |       |      |   |       |      |   |   |
|------------------|---|-----|-----|--------|--------|--------|-------|-------|------|---|-------|------|---|---|
| IFN- $\alpha$ 2  | 2 | 44  | 34  | -0.831 | -1.444 | -0.219 | -2.66 | 0.008 | 1.8  | 1 | 0.185 | 43.0 | - | - |
| NLPR3            | 2 | 47  | 30  | 3.506  | -1.822 | 8.835  | 1.29  | 0.197 | 46.8 | 1 | 0.000 | 97.9 | - | - |
| S100 $\beta$     | 2 | 235 | 129 | -0.041 | -0.483 | 0.401  | -0.18 | 0.854 | 4.1  | 1 | 0.043 | 75.6 | - | - |
| CCL15<br>(MIP-5) | 2 | 156 | 152 | -0.204 | -0.427 | 0.019  | -1.80 | 0.073 | 0.6  | 1 | 0.436 | 0.0  | - | - |
| IL-21            | 2 | 101 | 48  | 1.166  | -1.376 | 3.708  | 0.90  | 0.369 | 40.8 | 1 | 0.000 | 97.5 | - | - |
| NT-pro BNP       | 2 | 192 | 70  | 0.533  | 0.256  | 0.809  | 3.78  | 0.000 | 0.7  | 1 | 0.415 | 0.0  | - | - |
| sLAG3            | 2 | 66  | 57  | 0.262  | -0.949 | 1.473  | 0.42  | 0.672 | 9.1  | 1 | 0.003 | 89.0 | - | - |

**Supplementary Table 7. Summary of comparative outcomes of cerebrospinal fluid cytokines levels in individuals with PD versus controls.**

| Cytokines                     | No. Of Studies | No. Of Cases |     | Main Effect |        |       |         |         | Heterogeneity |    |         | Publication Bias   |                 |         |
|-------------------------------|----------------|--------------|-----|-------------|--------|-------|---------|---------|---------------|----|---------|--------------------|-----------------|---------|
|                               |                | PD           | HC  | Hedges's g  | LCI    | UCI   | z Score | P Value | Q Statistic   | df | P Value | I <sup>2</sup> (%) | Egger Intercept | P Value |
| IL-6                          | 14             | 816          | 440 | 0.559       | 0.163  | 0.955 | 2.76    | 0.006   | 126.0         | 13 | 0.000   | 89.7               | 4.218           | 0.027   |
| TNF- $\alpha$                 | 11             | 448          | 280 | 0.599       | 0.023  | 1.175 | 2.04    | 0.042   | 123.0         | 10 | 0.000   | 91.9               | 8.160           | 0.002   |
| IL-1 $\beta$                  | 11             | 444          | 252 | 0.326       | 0.105  | 0.547 | 2.89    | 0.004   | 194.7         | 7  | 0.000   | 96.4               | 3.105           | 0.083   |
| CRP                           | 8              | 473          | 303 | 1.231       | 0.321  | 2.141 | 2.65    | 0.008   | 19.9          | 10 | 0.030   | 49.7               | 7.361           | 0.080   |
| IFN- $\gamma$                 | 6              | 152          | 123 | -0.407      | -1.100 | 0.287 | -1.15   | 0.250   | 5.4           | 3  | 0.143   | 44.7               | -3.185          | 0.463   |
| CCL2<br>(MCP-1)               | 5              | 258          | 141 | 0.351       | 0.090  | 0.612 | 2.64    | 0.008   | 36.4          | 5  | 0.000   | 86.3               | 0.354           | 0.736   |
| IL-10                         | 4              | 113          | 100 | -0.003      | -0.376 | 0.370 | -0.02   | 0.988   | 23.8          | 3  | 0.000   | 87.4               | 4.523           | 0.336   |
| IL-8                          | 4              | 206          | 96  | -0.208      | -0.999 | 0.583 | -0.51   | 0.607   | 24.3          | 1  | 0.000   | 95.9               | -3.743          | 0.432   |
| IL-4                          | 4              | 109          | 85  | 0.024       | -0.834 | 0.883 | 0.05    | 0.956   | 5.5           | 4  | 0.240   | 27.3               | 5.784           | 0.389   |
| NO                            | 4              | 268          | 112 | 0.901       | 0.188  | 1.614 | 2.48    | 0.013   | 23.7          | 3  | 0.000   | 87.3               | 8.708           | 0.022   |
| PEG2                          | 4              | 488          | 127 | -0.111      | -0.460 | 0.238 | -0.62   | 0.533   | 25.5          | 3  | 0.000   | 88.2               | -24.570         | 0.499   |
| TGF- $\beta$ 1                | 4              | 127          | 93  | 1.456       | -0.098 | 3.011 | 1.84    | 0.066   | 9.5           | 3  | 0.023   | 68.4               | 15.453          | 0.109   |
| CX3CL1<br>(Fractalkine)       | 4              | 208          | 187 | -0.454      | -1.193 | 0.286 | -1.20   | 0.229   | 4.0           | 2  | 0.134   | 50.3               | -4.329          | 0.223   |
| YKL-40                        | 4              | 464          | 232 | -0.222      | -0.748 | 0.305 | -0.83   | 0.409   | 0.2           | 1  | 0.623   | 0.0                | 1.718           | 0.785   |
| S100 $\beta$                  | 4              | 444          | 289 | 0.276       | -0.063 | 0.614 | 1.60    | 0.110   | 0.2           | 1  | 0.625   | 0.0                | 4.829           | 0.513   |
| H <sub>2</sub> O <sub>2</sub> | 3              | 250          | 96  | 0.164       | -0.172 | 0.500 | 0.95    | 0.340   | 0.0           | 0  | 1.000   | 0.0                | -15.699         | 0.370   |
| TGF- $\alpha$                 | 3              | 82           | 53  | 0.442       | -0.809 | 1.693 | 0.69    | 0.489   | 0.3           | 1  | 0.602   | 0.0                | 12.527          | 0.020   |
| IL-2                          | 2              | 33           | 26  | 1.358       | -1.811 | 4.527 | 0.84    | 0.401   | 0.0           | 0  | 1.000   | 0.0                | -               | -       |
| IL-12 P70                     | 2              | 32           | 38  | -0.109      | -0.581 | 0.363 | -0.45   | 0.651   | 69.7          | 3  | 0.000   | 95.7               | -               | -       |
| IL-12 P40                     | 2              | 24           | 27  | -0.039      | -0.604 | 0.525 | -0.14   | 0.891   | 55.9          | 1  | 0.000   | 98.2               | -               | -       |
| CCL4                          | 2              | 86           | 45  | -0.266      | -0.626 | 0.094 | -1.45   | 0.147   | 25.5          | 3  | 0.000   | 88.3               | -               | -       |

|                    |   |     |     |       |        |       |      |       |      |   |       |      |   |   |
|--------------------|---|-----|-----|-------|--------|-------|------|-------|------|---|-------|------|---|---|
| (MIP-1 $\beta$ )   |   |     |     |       |        |       |      |       |      |   |       |      |   |   |
| TGF- $\beta$ 2     | 2 | 59  | 37  | 2.647 | -2.379 | 7.673 | 1.03 | 0.302 | 0.0  | 0 | 1.000 | 0.0  | - | - |
| CCL11<br>(Eotaxin) | 2 | 85  | 44  | 0.265 | -0.098 | 0.628 | 1.43 | 0.152 | 0.0  | 0 | 1.000 | 0.0  | - | - |
| IL-18              | 2 | 80  | 60  | 0.059 | -0.273 | 0.391 | 0.35 | 0.727 | 26.5 | 3 | 0.000 | 88.7 | - | - |
| EGF                | 2 | 32  | 23  | 0.364 | -0.807 | 1.535 | 0.61 | 0.542 | 0.1  | 1 | 0.794 | 0.0  | - | - |
| sTREM2             | 2 | 332 | 180 | 0.073 | -0.429 | 0.574 | 0.28 | 0.776 | 0.0  | 0 | 1.000 | 0.0  | - | - |

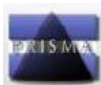

Supplementary Table 1. PRISMA 2009 Checklist.

| Section/topic             | # | Checklist item                                                                                                                                                                                                                                                                                              | Reported on page # |
|---------------------------|---|-------------------------------------------------------------------------------------------------------------------------------------------------------------------------------------------------------------------------------------------------------------------------------------------------------------|--------------------|
| <b>TITLE</b>              |   |                                                                                                                                                                                                                                                                                                             |                    |
| Title                     | 1 | Identify the report as a systematic review, meta-analysis, or both.                                                                                                                                                                                                                                         | 1                  |
| <b>ABSTRACT</b>           |   |                                                                                                                                                                                                                                                                                                             |                    |
| Structured summary        | 2 | Provide a structured summary including, as applicable: background; objectives; data sources; study eligibility criteria, participants, and interventions; study appraisal and synthesis methods; results; limitations; conclusions and implications of key findings; systematic review registration number. | 2                  |
| <b>INTRODUCTION</b>       |   |                                                                                                                                                                                                                                                                                                             |                    |
| Rationale                 | 3 | Describe the rationale for the review in the context of what is already known.                                                                                                                                                                                                                              | 3                  |
| Objectives                | 4 | Provide an explicit statement of questions being addressed with reference to participants, interventions, comparisons, outcomes, and study design (PICOS).                                                                                                                                                  | 3-4                |
| <b>METHODS</b>            |   |                                                                                                                                                                                                                                                                                                             |                    |
| Protocol and registration | 5 | Indicate if a review protocol exists, if and where it can be accessed (e.g., Web address), and, if available, provide registration information including registration number.                                                                                                                               | 4                  |
| Eligibility criteria      | 6 | Specify study characteristics (e.g., PICOS, length of follow-up) and report characteristics (e.g., years considered, language, publication status) used as criteria for eligibility, giving rationale.                                                                                                      | 4                  |
| Information sources       | 7 | Describe all information sources (e.g., databases with dates of coverage, contact with study authors to identify additional studies) in the search and date last searched.                                                                                                                                  | 4                  |

|                                    |    |                                                                                                                                                                                                                        |     |
|------------------------------------|----|------------------------------------------------------------------------------------------------------------------------------------------------------------------------------------------------------------------------|-----|
| Search                             | 8  | Present full electronic search strategy for at least one database, including any limits used, such that it could be repeated.                                                                                          | 4   |
| Study selection                    | 9  | State the process for selecting studies (i.e., screening, eligibility, included in systematic review, and, if applicable, included in the meta-analysis).                                                              | 4   |
| Data collection process            | 10 | Describe method of data extraction from reports (e.g., piloted forms, independently, in duplicate) and any processes for obtaining and confirming data from investigators.                                             | 4-5 |
| Data items                         | 11 | List and define all variables for which data were sought (e.g., PICOS, funding sources) and any assumptions and simplifications made.                                                                                  | 4-5 |
| Risk of bias in individual studies | 12 | Describe methods used for assessing risk of bias of individual studies (including specification of whether this was done at the study or outcome level), and how this information is to be used in any data synthesis. | 5   |
| Summary measures                   | 13 | State the principal summary measures (e.g., risk ratio, difference in means).                                                                                                                                          | 5   |
| Synthesis of results               | 14 | Describe the methods of handling data and combining results of studies, if done, including measures of consistency (e.g., $I^2$ for each meta-analysis).                                                               |     |
| Risk of bias across studies        | 15 | Specify any assessment of risk of bias that may affect the cumulative evidence (e.g., publication bias, selective reporting within studies).                                                                           | 5   |
| Additional analyses                | 16 | Describe methods of additional analyses (e.g., sensitivity or subgroup analyses, meta-regression), if done, indicating which were pre-specified.                                                                       | 5   |
| <b>RESULTS</b>                     |    |                                                                                                                                                                                                                        |     |
| Study selection                    | 17 | Give numbers of studies screened, assessed for eligibility, and included in the review, with reasons for exclusions at each stage, ideally with a flow diagram.                                                        | 6   |

|                               |    |                                                                                                                                                                                                          |      |
|-------------------------------|----|----------------------------------------------------------------------------------------------------------------------------------------------------------------------------------------------------------|------|
| Study characteristics         | 18 | For each study, present characteristics for which data were extracted (e.g., study size, PICOS, follow-up period) and provide the citations.                                                             | 6    |
| Risk of bias within studies   | 19 | Present data on risk of bias of each study and, if available, any outcome level assessment (see item 12).                                                                                                | 7-8  |
| Results of individual studies | 20 | For all outcomes considered (benefits or harms), present, for each study: (a) simple summary data for each intervention group (b) effect estimates and confidence intervals, ideally with a forest plot. | 6-8  |
| Synthesis of results          | 21 | Present results of each meta-analysis done, including confidence intervals and measures of consistency.                                                                                                  | 6-8  |
| Risk of bias across studies   | 22 | Present results of any assessment of risk of bias across studies (see Item 15).                                                                                                                          | 7-8  |
| Additional analysis           | 23 | Give results of additional analyses, if done (e.g., sensitivity or subgroup analyses, meta-regression [see Item 16]).                                                                                    | 7-8  |
| <b>DISCUSSION</b>             |    |                                                                                                                                                                                                          |      |
| Summary of evidence           | 24 | Summarize the main findings including the strength of evidence for each main outcome; consider their relevance to key groups (e.g., healthcare providers, users, and policy makers).                     | 8-9  |
| Limitations                   | 25 | Discuss limitations at study and outcome level (e.g., risk of bias), and at review-level (e.g., incomplete retrieval of identified research, reporting bias).                                            | 9-13 |
| Conclusions                   | 26 | Provide a general interpretation of the results in the context of other evidence, and implications for future research.                                                                                  | 13   |
| <b>FUNDING</b>                |    |                                                                                                                                                                                                          |      |
| Funding                       | 27 | Describe sources of funding for the systematic review and other support (e.g., supply of data); role of funders for the systematic review.                                                               | 13   |

From: Moher D, Liberati A, Tetzlaff J, Altman DG, The PRISMA Group (2009). Preferred Reporting Items for Systematic Reviews and Meta-Analyses: The PRISMA

Statement. PLoS Med 6(7): e1000097. doi:10.1371/journal.pmed1000097

**Supplementary Table 2. Search strategy.**

---

| MeSH                | Terms                                                                                                                                                                                                                                                                                                                    |
|---------------------|--------------------------------------------------------------------------------------------------------------------------------------------------------------------------------------------------------------------------------------------------------------------------------------------------------------------------|
| Parkinson's disease | 'Parkinson disease' OR Parkinson OR Parkinsonism                                                                                                                                                                                                                                                                         |
| Inflammation        | Inflammation OR inflammatory OR 'Tumor Necrosis Factor' OR Cytokines<br>OR 'C-reactive protein' OR interleukin OR chemokine OR interferon OR<br>'transforming growth factor'                                                                                                                                             |
| Sources             | Peripheral OR CSF OR 'cerebrospinal fluid' OR blood OR serum OR plasma                                                                                                                                                                                                                                                   |
| Combined            | ('Parkinson disease' OR Parkinson OR Parkinsonism) AND (Inflammation<br>OR inflammatory OR 'Tumor Necrosis Factor' OR Cytokines OR 'C-reactive<br>protein' OR interleukin OR chemokine OR interferon OR 'transforming<br>growth factor') AND (peripheral OR CSF OR 'cerebrospinal fluid' OR blood<br>OR serum OR plasma) |

---

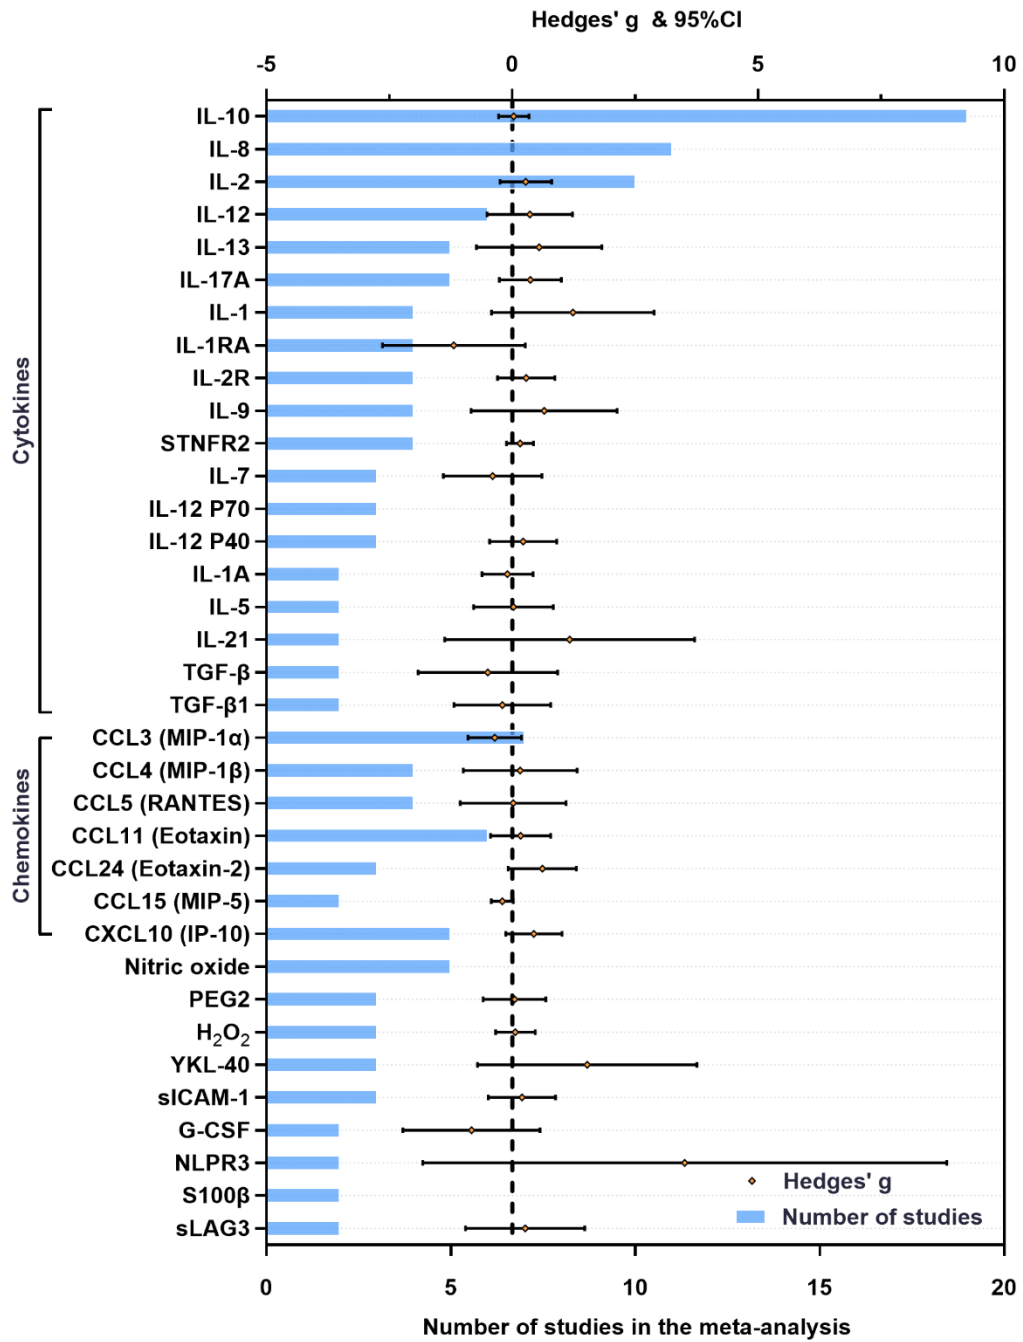

Supplementary Figure 1. Comparative outcomes of peripheral blood cytokines levels for PD patients versus controls (not significant).



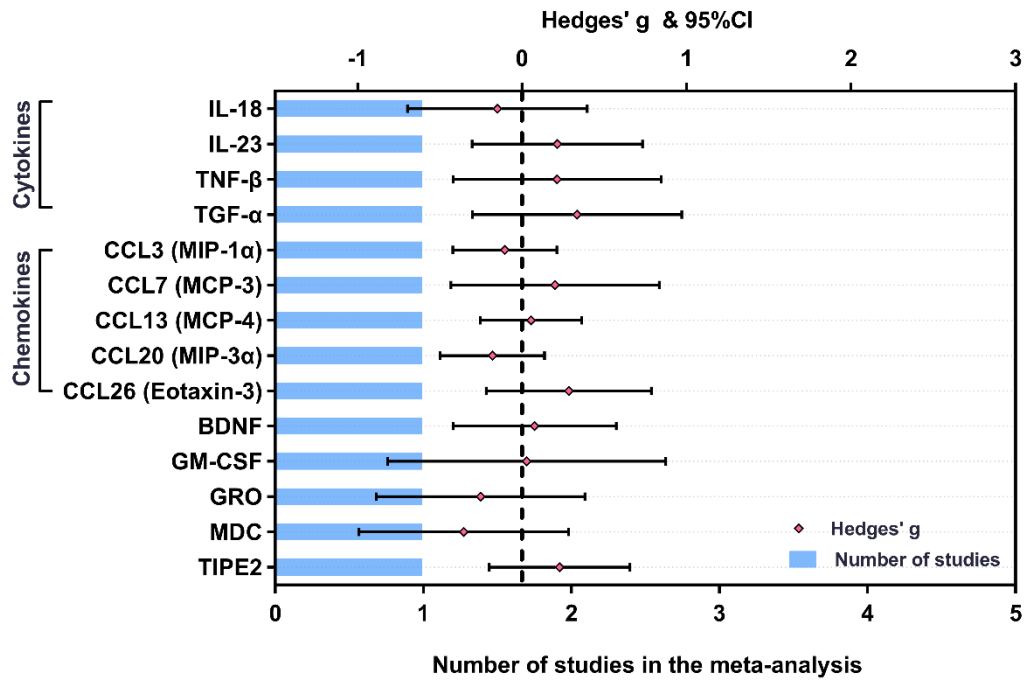

Supplementary Figure 2. Comparative outcomes of peripheral blood cytokines levels for PD patients versus controls in the systematic review (not significant).

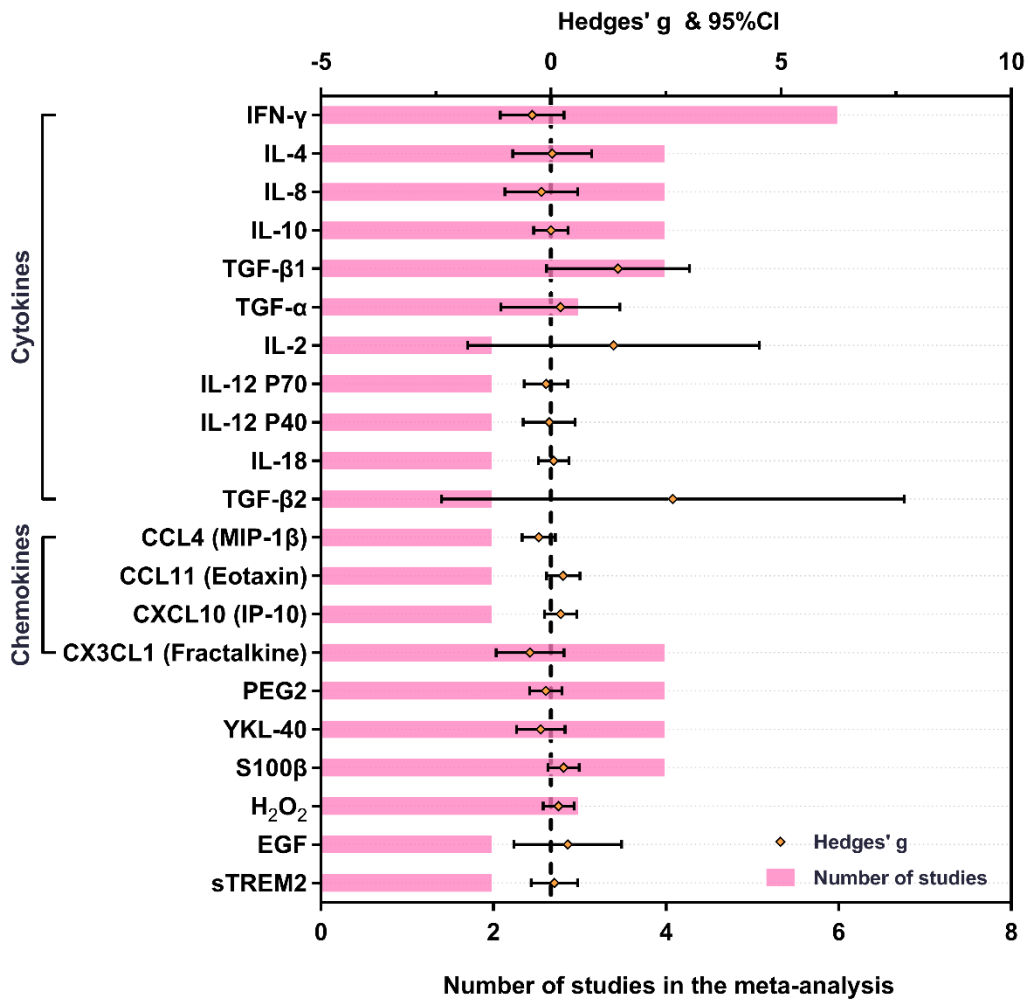

Supplementary Figure 3. Comparative outcomes of cerebrospinal fluid cytokines levels for PD patients versus controls (not significant).

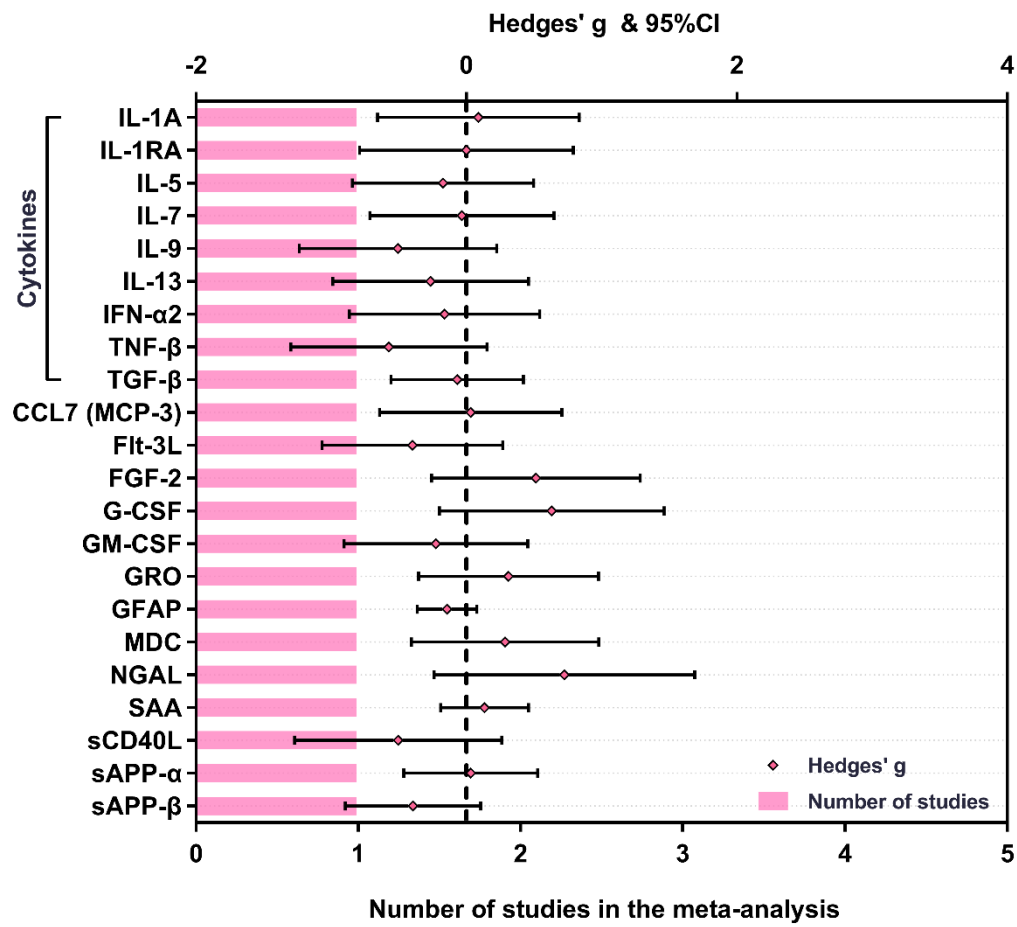

Supplementary Figure 4. Comparative outcomes of cerebrospinal fluid cytokines levels for PD patients versus controls in the systematic review (not significant).

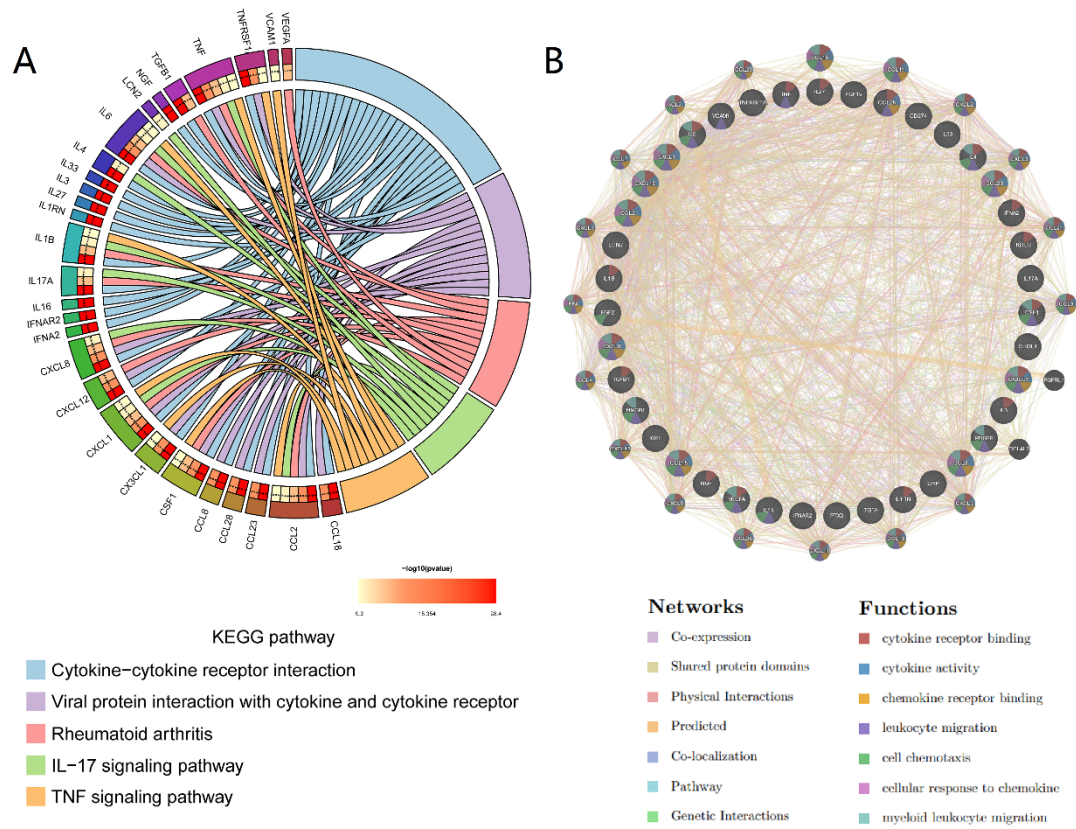

Supplementary Figure 5. KEGG pathway enrichment analysis (A) and PPI network construction analysis (B).
